# Supplementary material for: Review and Synthesis: Peatland and Wetland Models Simulating CH 4 Production, CH 4 Oxidation and CH 4 Transport Pathways
Source: Copernicus journal article supplement (doi:10.5194/egusphere-2024-3852), 2024-12-17
Supplement: Supplementary file 1 [file egusphere-2024-3852-supplement.pdf]

## Supplementary section

**CLM-Microbe:** This model simulates CH<sub>4</sub> fluxes from different wetland and peatland types by explicitly simulating microbial processes of CH<sub>4</sub> production (hydrogenotrophic methanogenesis based on H<sub>2</sub> and CO<sub>2</sub> and acetoclastic methanogenesis based on acetic acid) and CH<sub>4</sub> oxidation (aerobic and anaerobic methanotrophy) and dissolved organic carbon fermentation (Xu et al., 2015; Wang et al., 2019). Overall, this model simulates interactions between substrate production, environmental factors, peat carbon mineralization, CH<sub>4</sub> production, oxidation and CH<sub>4</sub> transport pathways (plant transport, ebullition, and diffusion) (Xu et al. 2015; Wang et al., 2019). Hydrological processes such as interception, throughfall, canopy drip, snow melt and accumulation, infiltration, evaporation, surface runoff, sub-surface drainage, groundwater discharge and recharge in soil and unconfined aquifer (Oleson et al., 2010) are simulated using Community Land Model (CLM4.5) (Thornton et al., 2007; Koven et al., 2013). The model simulates ten soil/peat layers, five snowpack layers overlying the soil layers and five bedrock layers underneath the soil layers (Xu et al., 2015; Wang et al., 2019; Zuo et al., 2022).

**HIMMELI:** Helenski Model of Methane Build-up and Emission for Peatlands (HIMMELI) is not a full carbon peatland model, but rather an independent CH<sub>4</sub> module simulating production, oxidation and three transport pathways (plant transport, ebullition, and diffusion) from wetlands and peatlands (Raivonen et al., 2017). This model simulates a 1-dimensional vertical layered peat profile driven by peat temperature, leaf area index (LAI), water table depths (WTDs) and anaerobic carbon decomposition rate where the model user can define the peat depths and layer thickness (Raivonen et al., 2017). The WTDs divide the 1-D vertical peat column into water filled and air-filled parts, greatly impacting CO<sub>2</sub>, O<sub>2</sub> and CH<sub>4</sub> fluxes. The vertical root distribution determines the anoxic respiration and gas transport into roots (Raivonen et al., 2017). If the model user defines a peat depth of more than 2 m, then the model does not simulate root growth beyond 2 m depth (Raivonen et al., 2017).

**Peatland-VU:** Peatland-VU is a process-based model that simulates CO<sub>2</sub> and CH<sub>4</sub> fluxes from peat soils based on 4 sub-modules: soil physics module for computing peat temperature, water saturation, WTDs, ice content; CO<sub>2</sub> and CH<sub>4</sub> sub modules and organic production sub module (van Huissteden et al., 2006; 2009). The multiple soil organic matter (SOM) pools in the model such as peat, solid and liquid manure, litter, roots, rhizodeposition, microbial biomass and resistant soil organic matter are adapted from Jenkinson and Rayner (1977). Each SOM pool has a specific decomposition rate, impacted by peat temperature, peat moisture, pH and priming (van Huissteden et al., 2006). The decomposition reaction for each SOM pool is partitioned between CO<sub>2</sub>, microbial biomass and humus pool based on first order rate kinetics (Jenkinson and Rayner 1977; van Huissteden et al., 2006; 2009). The peat temperature is computed using heat flow equation, a function of time, peat depth and thermal diffusivity, varying strongly with water contents (van Huissteden et al., 2006).

**BASGRA-BGC:** Basic Grass Model-Biogeochemical Cycle is a process-based model simulating C balance, biomass productivity and CO<sub>2</sub> and CH<sub>4</sub> fluxes from drained peatlands cultivated with grasslands (Huang et al., 2021). BASGRA-BGC is a process based daily time step derived from BASGRA simulating grass roots dynamics, biomass productivity and tillers with detailed processes for cold hardening and dehardening (Höglind et al., 2016). The BASGRA-N module incorporates soil physical, biological, and detailed soil N processes and plant N allocations (Höglind et al., 2016; 2020). However, BASGRA-N simulates single soil/peat layer, does not simulate drainage and CH<sub>4</sub> process (Höglind et al., 2016; 2020) and therefore, BASGRA-BGC simulates multiple vertical soil/peat layers having detailed hydrological and biogeochemical processes, while simultaneously simulating CO<sub>2</sub> and CH<sub>4</sub> fluxes from drained grassland peat soils (Huang et al., 2021). The different simulated hydrological processes are soil water infiltration, evaporation and transpiration, soil temperature, and freezing and thawing processes (Arnold and Fohrer, 2005). The decomposition of litter and soil organic matter is derived from Century model and partitioned into two litter pools (structural and metabolic) and three soil organic matter pools (labile, passive, and slow) (Parton, 1996). This model accounts for oxygen stress to the grass, based on a simple linear curve derived from Aquacrop model (Raes et al., 2012) since peat soils often exhibit waterlogged conditions leading to oxygen stress for grass growth (Huang et al., 2021).

**Wetland DNDC:** Wetland-DNDC is a process-based model simulating interactions between climate, soil physical processes, plant growth, soil and plant decomposition, soil nitrification, denitrification, and fermentation (Li et al., 1992, 2000; Stange et al., 2000; Zhang et al., 2002a, b). The soil, plant and decomposition sub-models quantify soil temperature, soil moisture, pH, redox, while nitrification, denitrification and fermentation sub models simulate biogeochemical processes regulated by microbial reactions, plant roots, litter, and hydrology (Deng et al., 2015). The plant litter production and its incorporation into soil organic matter is based on C:N ratio, decomposition rates, peat temperature and moisture conditions (Li et al., 1992). The CH<sub>4</sub> production is simulated using electron donors (H<sub>2</sub> and dissolved organic carbon (DOC)) and acceptors (NO<sub>3</sub>, Mn<sup>4+</sup>, Fe<sup>3+</sup>, SO<sub>4</sub><sup>2-</sup>, and CO<sub>2</sub>) respectively (Deng et al., 2015). The Wetland DNDC was modified by Li et al. (2004a) to simulate variable water levels, harvesting of forest, tree planting, chopping, and burning.

**ORCHIDEE-PCH<sub>4</sub>:** The Organizing Carbon and Hydrology in Dynamic Ecosystems (ORCHIDEE) is a dynamic global land surface model simulating carbon, water and energy fluxes between biosphere, land surface, geosphere, and atmosphere (Qiu et al., 2018). The carbon in ORCHIDEE simulates photosynthesis, respiration, soil carbon cycle, CO<sub>2</sub> production and GHG emissions (Qiu et al., 2018). Since the ORCHIDEE model did not simulate soil thermal processes, hydraulic processes, snowpack dynamics and plant and soil carbon fluxes, the ORCHIDEE-MICT (Guimberteau et al., 2018) and ORCHIDEE-Peat (Largeron et al., 2018; Qiu et al., 2018; Qiu et al., 2019) were developed. The ORCHIDEE-Peat does not simulate three carbon pools (active, passive, and slow) as simulated by ORCHIDEE and ORCHIDEE-MICT, but rather simulates two distinct pools (acrotelm and catotelm) (Qiu et al., 2018). So, the carbon from the decomposed litter pool is added into the acrotelm and catotelm pool which is located above and below the water table respectively (Qiu et al., 2018). The carbon in acrotelm in decomposed aerobically and anaerobically if above and below water table respectively, while the permanently saturated catotelm receives a prescribed fraction of carbon from the acrotelm pool which is decomposed anaerobically at a very slow rate (Qiu et al., 2018). The hydrological processes simulated by the model are rainfall interception, soil water transport, latent and sensible heat fluxes, and heat diffusion in soil/peat (Largeron et al., 2018; Qiu et al., 2018). The CH<sub>4</sub> production, oxidation and transport derived from Khvorostyanov et al. (2008a, b) and incorporated into ORCHIDEE-Peat (Qiu et al., 2018) and ORCHIDEE-PCH<sub>4</sub> (Salmon et al., 2022). ORCHIDEE-PCH<sub>4</sub> simulates different plant functional types (PFTs) such as mosses, sedges, graminoids and grasslands (Qiu et al., 2018; Salmon et al., 2022).

**WETMETH 1.0:** WETMETH is a process-based model integrated into University of Victoria Earth System model (UVic ESCM) (Weaver et al., 2001) for simulating CH<sub>4</sub> fluxes from wetlands and peatlands (Nzotungicimpaye et al., 2021). The UVicESCM is a three-dimensional ocean circulation model inbuilt into thermodynamic sea-ice model and two-dimensional energy moisture balance model for simulating interactions between the atmosphere and land surface (Weaver et al., 2001). The land surface component of this model is derived from Met Office Surface Exchange Scheme (MOSES) having 14 layers of unequal thickness up to a depth of 250 m and simulates freeze-thaw dynamics (Avis et al., 2011). The top 8 layers are soil layers having a total depth of 10 m, that interact with atmosphere and simulate water cycle, while the remaining 6 layers are bedrock layers (Avis et al., 2011). WETMETH 1.0 embedded into UVicESCM, operates at 3.6° longitude and 1.8° latitude (Weaver et al., 2001). However, the wetlands and peatlands are identified within each grid cells based on topography (TOPMODEL) and moisture contents (Gedney and Cox, 2003; Avis et al., 2011) and simulates 5 plant functional types: broadleaf trees, needleleaf trees, shrubs, C3 and C4 grasses (Cox, 2001; Matthews et al., 2004; Meissner et al., 2003) derived from dynamic global model known as TRIFFID (Top-down Representative of Interactive Foliage and Flora including Dynamics) (Nzotungicimpaye et al., 2021).

**Terrestrial Ecosystem Model (TEM):** TEM is a process based biogeochemical model simulating interactions between carbon, nitrogen, water, heat, and soil for terrestrial ecosystems (Melillo et al., 1993; Zhuang et al., 2007). TEM-CH<sub>4</sub> module simulates CH<sub>4</sub> production, oxidation and transport between peat and atmosphere. The CH<sub>4</sub> production in anaerobic zone is regulated by soil/peat thermal conditions, pH, redox, and organic substrate (Zhuang et al., 2004; Tang et al., 2010), while CH<sub>4</sub> oxidation in aerobic zone is regulated by soil methane, O<sub>2</sub> concentrations, soil temperature, pH and redox (Zhuang et al., 2004; Tang et al., 2010). The depth of anaerobic and aerobic zones is regulated by WTDs. However, since the model does not simulate O<sub>2</sub> in the aqueous phase, Tang et al. (2010) modified the TEM-CH<sub>4</sub> by simultaneously simulating four substances consisting of O<sub>2</sub>, N<sub>2</sub>, CO<sub>2</sub> and CH<sub>4</sub> with the ebullition simulated using the probabilistic pressure-based algorithm having bubble formation and redissolution (Tang et al., 2010).

**TRIPLEX-GHG:** It is a process-based model that integrates hydrology, vegetation dynamics (canopy physiology and phenology), terrestrial carbon balance and CO<sub>2</sub> and CH<sub>4</sub> fluxes (Foley et al., 1996; Peng et al., 2013). The WTDs in hydrology module are simulated using volume of water in the peat profile, porosity, minimum volumetric water content and evaporation (Frolking and Crill, 1994; Granberg et al., 1999; Zhuang et al., 2004). However, the model does not simulate drainage from the bottommost peat layer, while the excess water is released as runoff when the position of the water table is higher than the maximum standing water (Zhu et al., 2014). The model simulates 6 soil/peat layers having a total depth of 4 m.

**Lund-Potsdam-Jena Wetland Hydrology and Methane DGV Model (LPJWhyMe v1.3.1):** LPJWhyMe was added to the original model LPJ (Lund-Potsdam-Jena Dynamic Global Vegetation Model) developed by Sitch et al. (2003) and Gerten et al. (2004) and LPJ-Why (Lund-Potsdam Jena Dynamic Global Vegetation Model Wetland Hydrology) developed by Wania et al. (2009a, b). LPJ is a process-based model simulating interactions between plant physiology, carbon allocation, decomposition, and hydrology. The model simulates different plant functional types (PFTs), with each PFTs having specific physiological parameters, rooting depths, above and below ground biomass, while competing for light and nutrients (Sitch et al., 2003). However, existing PFTs did not simulate permafrost and peatland processes, so two additional PFTs i.e., flood tolerant C3 graminoid and

*Sphagnum* mosses were developed into LPJWhy. Further, a CH<sub>4</sub> sub-routine was added into LPJWhy, having a potential carbon pool for methanogenesis known as LPJWhyMe. This pool was distributed in all soil layers, dependent upon root distribution in each soil layer having greater carbon allocation in the uppermost layers having greater root densities, compared to deeper soil layers with lower root densities (Wania et al., 2010). The LPJWhyMe simulates decomposition of above and below-ground litter based on fast and slow soil carbon pools having  $K_{fast}$  and  $K_{slow}$  rates respectively, with these rates being a function of temperature and moisture contents (Wania et al., 2009b; 2010).

**Ecosys:** This is 3-dimensional mechanistic model simulating interactions between hydrology, soil nutrient transformations and soil thermodynamics using grid cells, discretized soil, and canopy layers (Grant, 1997; 1998; 1999; Grant and Roulet, 2002). This model simulates surface hydrology, subsurface hydrology, infiltration, evaporation and macropore flow (Grant and Roulet, 2002; Morin et al., 2022). The vegetation is simulated using different plant functional types (PFTs) such as annual or perennial, evergreen, or deciduous, vascular, or non-vascular, N<sub>2</sub> fixing and non N<sub>2</sub> fixing and photosynthetic pathway (C3 and C4) (Grant et al., 2017a, b). Importantly, the model simulates different microbial function types (MFTs) based on stoichiometric and bioenergetic constraints. More details on CH<sub>4</sub> production, oxidation and transport pathways found in Grant and Roulet (2002).

**CLM4Me:** This is a process based CH<sub>4</sub> module developed by Riley et al. (2011) that simulates interactions between climate, soils, plants and hydrology. The CLM4Me is integrated into the CLM4 land model (Lawrence et al., 2011; Oleson et al., 2010). In CLM4Me, the hydrological processes are implemented in each grid cell which are inundated and non-inundated. Currently, the inundated fraction is computed from the simulated WTDs and surface runoff, which is required for computing CH<sub>4</sub> oxidation and production processes (Riley et al., 2011). The CLM4 land model simulates 15 soil layers, with hydrological simulations occurring in top 10 soil layers, while the remaining 5 layers are bedrock (Riley et al., 2011).

**PEPRMT:** Peatland Ecosystem Photosynthesis, Respiration and Methane Transport (PEPRMT) is a process-based model that simulates CO<sub>2</sub> and CH<sub>4</sub> dynamics in restored freshwater wetlands and rice paddies (Oikawa et al., 2017). PEPRMT simulates three carbon pools, namely fixed labile, stored in plant biomass and older recalcitrant soil organic carbon (Oikawa et al., 2017). The model simulates ecosystem respiration as a combination of autotrophic and heterotrophic respiration and is a function of soil temperature, available substrate, and water table height below the peat surface (Oikawa et al., 2017). The carbon stored in the plant biomass is not available for respiration or methane production, but the carbon stored in the labile and recalcitrant pool is available for respiration and methanogenesis. The CH<sub>4</sub> production is function of available soil carbon in labile pool and soil organic matter pool, maximum rate of methanogenesis enzyme kinetics for respective carbon pools in case of unlimiting substrate concentrations and methanogenesis half saturation concentrations for respective substrates Oikawa et al. (2017). However, the CH<sub>4</sub> production is inhibited by the presence of oxygen and depth of water table below the peat surface. Detailed mathematical equations on production, oxidation and transport provided in Oikawa et al. (2017).

**Methane emission model:** This is a one-dimensional model where CH<sub>4</sub> dynamics is regulated by the position of the water table from the peat surface and acrotelm and catotelm depths (Lai, 2009). The CH<sub>4</sub> fluxes are computed on a unit basis assuming homogeneous vegetation and microtopography (Lai, 2009). Meanwhile the changes in the water volume are determined using simple water balance. The snowmelt is computed using air temperature, while the potential evapotranspiration is computed based on day length, daily and monthly air temperatures (Lai, 2009). The organic matter decomposition of the acrotelm layer is regulated by the carbon amount, mineralization rate and its thickness, while the organic matter decomposition of the catotelm layer is based on the catotelm specific values (Lai, 2009). Since the anaerobic decomposition of organic matter produces both CH<sub>4</sub> and CO<sub>2</sub>, the CH<sub>4</sub> production is adjusted using CO<sub>2</sub>:CH<sub>4</sub> production ratio and WTDs. The model does not produce CH<sub>4</sub> below 100 cm due to low availability of labile substrates for methanogenesis (Lai, 2009).

**ELM Spruce:** ELM Spruce was developed to simulate hydrology, biogeochemistry, vegetation, CO<sub>2</sub> and CH<sub>4</sub> fluxes from forested peatlands (Hanson et al., 2016, 2017, 2020). This model mimics hummock and hollow microtopography's and stimulates lateral and vertical movement of water and solutes (Shi et al., 2015). The CH<sub>4</sub> processes include DOC fermentation, hydrogenotrophic methanogenesis, acetoclastic methanogenesis, aerobic methanotrophy, anaerobic methanotrophy and H<sub>2</sub> production (Ricciuto et al., 2021; Yuan et al., 2021). The model simulates 10 soil layers, with each soil layer having 11 pools and 34 transitions between different pools and detailed carbon and nitrogen cycling processes (Ricciuto et al., 2021; Yuan et al., 2021). The model also tracks concentrations of dissolved organic matter (DOC) and acetate in each soil layer and simulates three CH<sub>4</sub> transport pathways (plant transport, ebullition, and diffusion) (Ricciuto et al., 2021).

**CH4MOD:** This model was developed to simulate CH<sub>4</sub> fluxes from rice paddies (Huang et al., 1998a ; 2004; 2006), but Li et al. (2010) modified the model to enable it to simulate CH<sub>4</sub> fluxes from natural wetlands. Methane production rates are simulated based on the available methanogenic substrates (root exudates, litter and soil organic matter decomposition), soil temperature, texture and redox potential (Li et al., 2010). The above-ground biomass is simulated based on the growing degree days (GDD), senescence degree days (SDD) and daily mean air temperatures. The model simulates production of carbohydrates from anaerobic decomposition of above-ground and below-ground litter and aerobic decomposition of above-ground litter (Li et al., 2010). The model currently does not simulate water table depths and only simulates two CH<sub>4</sub> transport pathways of plant transport and ebullition (Li et al., 2010).

## References

- Arnold, J.G., and Fohrer, N.: SWAT2000: current capabilities and research opportunities in applied watershed modelling, *Hydrol. Process*, 19(3), 563-572, <https://doi.org/10.1002/hyp.5611>, 2005.
- Avis, C.A., Weaver, A.J., and Meissner, K.J.: Reduction in areal extent of high-latitude wetlands in response to permafrost thaw, *Nat. Geoscience*, 4, 444-448, <https://doi.org/10.1038/ngeo1160>, 2011.
- Cox, P.M.: Description of the TRIFFID Dynamic Global Vegetation Model, Exeter, UK, Accessed on November 14, 2023, at <https://jules.jchmr.org/sites/default/files/2023-06/JULES-HCTN-24.pdf>, 2001.
- Deng, J., Li, C., and Frolking, S.: Modelling impacts of changes in temperature and water table on C gas fluxes in an Alaskan peatland, *Journal of Geophysical Research: Biogeosciences*, 120 (7), 1279-1295, <https://doi.org/10.1002/2014JG002880>, 2015.
- Foley, J.A., Colin, P.I., Ramankutty, N., Levis, S., Pollard, D., Sitch, S., and Haxeltine, A.: An integrated biosphere model of land surface processes, terrestrial carbon balance and vegetation dynamics, *Global Biogeochem. Cy.* 10, 603-628, <https://doi.org/10.1029/96GB02692>, 1996.
- Frolking, S. and Crill, P.: Climate Controls on Temporal Variability of Methane Flux from a Poor Fen in Southeastern New Hampshire: Measurement and Modeling, *Global Biogeochem. Cy.* 8, 385-397, <https://doi.org/10.1029/94GB01839>, 1994.
- Gedney, N., and Cox, P.M.: The sensitivity of global climate model simulations to the representation of soil moisture heterogeneity, *J. Hydrometeorol.* 4, 1265-1275, [https://doi.org/10.1175/1525-7541\(2003\)004%3C1265:TSGCM%3E2.0.CO;2](https://doi.org/10.1175/1525-7541(2003)004%3C1265:TSGCM%3E2.0.CO;2), 2003.
- Gerten, D., Schaphoff, S., Haberlandt, U., Lucht, W., and Sitch, S.: Terrestrial vegetation and water balance: hydrological evaluation of a dynamic global vegetation model, *J. Hydrol.* 286, 249-270, <https://doi.org/10.1016/j.jhydrol.2003.09.029>, 2004.
- Granberg, G., Grip, H., Ottosson Löfvenius, M., I. Sundh, I., Svensson, B.H., and Nilsson, M.: A simple model for simulation of water content, soil frost, and soil temperatures in boreal mixed mires, *Water Resources Research*, 35(12), 3591-3968, <https://doi.org/10.1029/1999WR900216>, 1999.
- Grant, R.F.: Changes in Soil Organic Matter under Different Tillage and Rotation: Mathematical Modeling in ecosys, *Soil Sci. Soc. Am. J.* 61, 1159-1175, <https://doi.org/10.2136/sssaj1997.03615995006100040023x>, 1997.
- Grant, R.F.: Simulation of methanogenesis in the mathematical model Ecosys, *Soil Biol. Biochem.* 30, 883-896, [https://doi.org/10.1016/S0038-0717\(97\)00218-6](https://doi.org/10.1016/S0038-0717(97)00218-6), 1998.
- Grant, R.F.: Simulation of methanotrophy in the mathematical model ecosys, *Soil Biology and Biochemistry*, 31(2), 287-297, [https://doi.org/10.1016/S0038-0717\(98\)00119-9](https://doi.org/10.1016/S0038-0717(98)00119-9), 1999.
- Grant, R., and Roulet, N.: Methane efflux from boreal wetlands: Theory and testing of the ecosystem model Ecosys with chamber and tower flux measurements, *Global Biogeochem. Cycles*, 16 (4), 1054, <https://doi.org/10.1029/2001GB001702>, 2002.

- Grant, R.F., Mekonnen, Z.A., Riley, W. J., Wainwright, H.M., Graham, D., and Torn, M.S.: Mathematical modelling of arctic polygonal tundra with Ecosys: 1. Microtopography determines how active layer depths respond to changes in temperature and precipitation, *Journal of Geophysical Research: Biogeosciences*, 122, 3161-3173, <https://doi.org/10.1002/2017JG004035>, 2017a.
- Grant, R.F., Mekonnen, Z.A., Riley, W.J., Arora, B., and Torn, M.S.: Mathematical modelling of arctic polygonal tundra with Ecosys: 2. Microtopography determines how CO<sub>2</sub> and CH<sub>4</sub> exchange responds to changes in temperature and precipitation, *Journal of Geophysical Research: Biogeosciences*, 122, 3174-3187, <https://doi.org/10.1002/2017JG004037>, 2017b.
- Guimberteau, M., Zhu, D., Maignan, F., Huang, Y., Yue, C., Dantec-Nédélec, S., Ottlé, C., Jornet-Puig, A., Bastos, A., Laurent, P., Goll, D., Bowring, S., Chang, J., Guenet, B., Tifafi, M., Peng, S., Krinner, G., Ducharne, A., Wang, F., Wang, T., Wang, X., Wang, Y., Yin, Z., Lauerwald, R., Joetzier, E., Qiu, C., Kim, H., and Ciais, P.: ORCHIDEE-MICT (v8.4.1), a land surface model for the high latitudes: model description and validation, *Geosci. Model Dev*, 11, 121-163, <https://doi.org/10.5194/gmd-11-121-2018>, 2018.
- Hanson, P. J., Gill, A.L., Xu, X., Philips, J.R., Wesston, D.J., Kolka, R.K., Riggs, J.S., and Hook, L.A.: Intermediate-scale community-level flux of CO<sub>2</sub> and CH<sub>4</sub> in a Minnesota peatland: Putting the SPRUCE project in a global context, *Biogeochemistry*, 129 (3), 255-272. <https://doi.org/10.1007/s10533-016-0230-8>, 2016.
- Hanson, P.J., Riggs, J.S., Nettles, W.R., Phillips, J.R., Krassovski, M.B., Hook, L.A., Gu, L., Richardson, A.D., Aubrecht, D.M., Ricciuto, D.M., Warren, J. M., and Barbier, C.: Attaining whole-ecosystem warming using air and deep-soil heating methods with an elevated CO<sub>2</sub> atmosphere, *Biogeosciences*, 14, 861-883, <https://doi.org/10.5194/bg-14-861-2017>, 2017.
- Hanson, P.J., Griffiths, N.A., Iversen, C.M., Norby, R.J., Sebestyén, S.D., Phillips, J.R., Chanton, J.P., Kolka, R.K., Malhotra, A., Oleheiser, K.C., Warren, J.M., Shi, X., Yang, X., Mao, J., and Ricciuto, D.M.: Rapid net carbon loss from a whole-ecosystem warmed Peatland. *AGU Advances*. 1, e2020AV000163. <https://doi.org/10.1029/2020AV000163>, 2020.
- Höglind, M., Van Oijen, M., Cameron, D., and Persson, T.: Process-based simulation of growth and over wintering of grassland using the BASGRA model, *Ecol. Model*, 335, 1-15, <https://doi.org/10.1016/j.ecolmodel.2016.04.024>, 2016.
- Höglind, M., Cameron, D., Persson, T., Huang, X., and van Oijen, M.: BASGRA\_N: a model for grassland productivity, quality, and greenhouse gas balance, *Ecol. Model*, 417, 108925, <https://doi.org/10.1016/j.ecolmodel.2019.108925>, 2020.
- Huang, Y., Sass, R.L., and Fisher, F. M.: A semi-empirical model of methane emission from flooded rice paddy soils, *Global Change Biol*, 4, 247-268, <https://doi.org/10.1046/j.1365-2486.1998.00129.x>, 1998a.
- Huang, Y., Zhang, W., Zheng, X.H., Li, J., and Yu, Y.Q.: Modeling methane emission from rice paddies with various agricultural practices, *J. Geophys. Res*, 109, D08113, <https://doi.org/10.1029/2003JD004401>, 2004.
- Huang, Y., Zhang, W., Zheng, X.H., Han, S.H., and Yu, Y.Q.: Estimates of methane emissions from Chinese rice paddies by linking a model to GIS database, *Acta Ecol. Sin*, 26 (4), 980-988, [https://doi.org/10.1016/S1872-2032\(06\)60016-4](https://doi.org/10.1016/S1872-2032(06)60016-4), 2006.
- Huang, Y., Ciais, P., Luo, Y., Zhu, D., Wang, Y., Qiu, C., Goll, D.S., Guenet, B., Makowski, D., De Graaf, I., Leifeld, J., Kwon, M.J., Hu, J., and Qu, L.: Tradeoff of CO<sub>2</sub> and CH<sub>4</sub> emissions from global peatlands under water-table drawdown, *Nat. Clim. Chang*, 11, 618-622, <https://doi.org/10.1038/s41558-021-01059-w>, 2021.
- Jenkinson, D.S., and Rayner, J. H.: The turnover of soil organic matter in some of the Rothamsted classical experiments, *Soil Science*, 123(5), 298-305, <https://doi.org/10.1097/00010694-197705000-00005>, 1977.
- Khvorostyanov, D.V., Krinner, G., Ciais, P., Heimann, M., and Zimov, S.A.: Vulnerability of permafrost carbon to global warming, Part I: Model description and role of heat generated by organic matter decomposition, *Tellus B*. 60, 250-264, <https://doi.org/10.1111/j.1600-0889.2007.00333.x>, 2008a.

- Khvorostyanov, D.V., Ciais, P., Krinner, G., Zimov, S.A., Corradi, C., and Guggenberger, G.: Vulnerability of permafrost carbon to global warming. Part II: Sensitivity of permafrost carbon stock to global warming. *Tellus B*, 60, 265-275. <https://doi.org/10.1111/j.1600-0889.2007.00336.x>, 2008b.
- Koven, C.D., Riley, W.J., Subin, Z.M., Tang, J.Y., Torn, M.S., Collins, W.D., Bonan, G.B., Lawrence, D.M., and Swenson, S.C.: The effect of vertically resolved soil biogeochemistry and alternate soil C and N models on C dynamics of CLM4, *Biogeosciences*, 10, 7109-7131, <https://doi.org/10.5194/bg-10-7109-2013>, 2013.
- Lai, D.Y.F.: Modelling the effects of climate change on methane emission from a northern ombrotrophic bog in Canada, *Environ Geology*, 58, 1197-1206, <https://doi.org/10.1007/s00254-008-1613-5>, 2009.
- Largerone, C., Krinner, G., Ciais, P., and Brutel-Vuilmet, C.: Implementing northern peatlands in a global land surface model: description and evaluation in the ORCHIDEE high-latitude version model (ORC-HL-PEAT), *Geosci. Model Dev*, 11, 3279-3297, <https://doi.org/10.5194/gmd-11-3279-2018>, 2018.
- Lawrence, D.M., Oleson, K.W., Flanner, M.G., Thornton, P.E., Swenson, S.C., Lawrence, P.J., Zeng, X., Yang, Z.L., Levis, S., Sakaguchi, K., Bonan, G.B., and Slater, A.G.: Parameterization Improvements and Functional and Structural Advances in Version 4 of the Community Land Model, *Journal of Advances in Modeling Earth Systems*, 3, M03001, <https://doi.org/10.1029/2011ms000045>, 2011.
- Li, C., Frohling, S., and Frohling, T.A.: A model of nitrous oxide evolution from soil driven by rainfall events: 1. Model structure and sensitivity, *Journal of Geophysical Research: Atmosphere*, <https://doi.org/10.1029/92JD00509>, 1992.
- Li, C., Frohling, S., and Frohling, T.A.: A model of nitrous oxide evolution from soil driven by rainfall events: 2. Model applications, *Journal of Geophysical Research: Atmosphere*, <https://doi.org/10.1029/92JD00510>, 1992.
- Li, C.S.: Modeling trace gas emissions from agricultural ecosystems. In: Wassmann, R., Lantin, R.S., Neue, H.U. (eds) *Methane Emissions from Major Rice Ecosystems in Asia. Developments in Plant and Soil Sciences*, vol 91, Springer, Dordrecht, [https://doi.org/10.1007/978-94-010-0898-3\\_20](https://doi.org/10.1007/978-94-010-0898-3_20), 2000.
- Li, C., Cui, J., Sun, G. and Trettin, C.: Modelling Impacts of Management on Carbon Sequestration and Trace Gas Emissions in Forested Wetland Ecosystems, *Environmental Management*, 33 (Suppl 1), S176-S186, <https://doi.org/10.1007/s00267-003-9128-z>, 2004a.
- Li, T., Huang, Y., Zhang, W., and Song, C.: CH4MOD<sub>wetland</sub>: A biogeophysical model for simulating methane emissions from natural wetlands. *Ecological Modelling*, 221(4), 666-680, <https://doi.org/10.1016/j.ecolmodel.2009.05.017>, 2010.
- Matthews, H.D., Weaver, A.J., Meissner, K.J., Gillett, N.P., and Eby, M. Natural and anthropogenic climate change: incorporating historical land cover change, vegetation dynamics and global carbon cycle, *Climate Dynamics*, 22, 461-479, <https://doi.org/10.1007/s00382-004-0392-2>, 2001.
- Meissner, K.J., Weaver, A.J., Matthews, H.D., and Cox, P.M.: The role of land surface dynamics in glacial inception: A study with the UVic Earth System Model, *Clim. Dyn*, 21, 515-537, <https://doi.org/10.1007/s00382-003-0352-2>, 2003.
- Melillo, J.M., McGuire, A.D., Kicklighter, D.W., Moore, B., Vorosmarty, C.J., and Schloss, A.L.: Global climate change and terrestrial net primary production. *Nature*, 363, 234-240, <https://doi.org/10.1038/363234a0>, 1993.
- Morin, T.H., Riley, W.J., Grant, R.F., Mekonnen, Z., Stefanik, K.C., Sanchez, A-C-R., Mulhare, M.A., Villa, J., Wrighton, K., Bohrer, G.: Water level changes in Lake Erie drive 21<sup>st</sup> century CO<sub>2</sub> and CH<sub>4</sub> fluxes from a coastal temperate wetland, *Science of The Total Environment*, 821, 153087, <https://doi.org/10.1016/j.scitotenv.2022.153087>, 2022.
- Nzotungicimpaye, C.-M., Zickfeld, K., MacDougall, A.H., Melton, J.R., Treat, C.C., Eby, M., and Lesack, L.F.W.: WETMETH 1.0: a new wetland methane model for implementation in Earth system models. *Geosci. Model Dev*, 14, 6215-6240, <https://doi.org/10.5194/gmd-14-6215-2021>, 2021.

- Oikawa, P.Y., Jenerette, G.D., Knox, S.H., Sturtevant, C., Verfaillie, J., Dronova, I., Poindexter, C.M., Eichelmann, E., Baldocchi, D.D.: Evaluation of a hierarchy of models reveals the importance of substrate limitation for predicting carbon dioxide and methane exchange in restored wetlands, *J. Geophys. Res. Biogeosci.* 122, 145-167, <https://doi.org/10.1002/2016JG003438>, 2017.
- Oleson, K.W., Lawrence, D.M., Bonan, G.B., Flanner, M.G., Kluzek, E., Lawrence, P. J., Levis, S., Swenson, S.C., Thornton, P.E., Dai, A., Decker, M., Dickinson, R., Feddema, J., Heald, C.L., Hoffman, F., Lamarque, J.-F., Mahowald, N., Niu, G.-Y., Qian, T., Randerson, J., Running, S., Sakaguchi, K., Slater, A., Stöckli, R., Wang, A., Yang, Z.-L., Zeng, X., and Zeng, X.: Technical description of version 4.0 of the Community Land Model (NCAR Tech. Note NCAR/TN-478+STR). Retrieved from Boulder, CO: [https://doi.org/10.1175/1520-0442\(1998\)011<1307:tlscot>2.0.co;2](https://doi.org/10.1175/1520-0442(1998)011<1307:tlscot>2.0.co;2), 2010.
- Oleson, K.W., Bonan, G.B., Feddema, J.J., Vertenstein, M., Kluzek, E.: Technical description of an urban parameterization for the Community Land Model (CLMU), NCAR Technical Note NCAR/TN-480+STR, 169 pp, 2010.
- Peng, C.H., Liu, J.X., Zhu, Q.A., and Chen, H.: Framework for Integrating greenhouse gas emission processes into a dynamic global vegetation model: TRIPLEX-GHG model development and testing, North America Carbon Program, New Mexico, 2013.
- Pirk, N., Peltola, O., Pawlak, W., Rasse, D., Rinne, J., Shaver, G., Schmid, H. P., Sottocornola, M., Steinbrecher, R., Sachs, T., Urbaniak, M., Zona, D., and Ziemblinska, K. ORCHIDEE-PEAT (revision 4596), a model for northern peatland CO<sub>2</sub>, water, and energy fluxes on daily to annual scales, *Geosci. Model Dev.* 11, 497-519, <https://doi.org/10.5194/gmd-11-497-2018>, 2018.
- Qiu, C., Zhu, D., Ciais, P., Guenet, B., Krinner, G., Peng, S., Aurela, M., Bernhofer, C., Brümmner, C., Bret-Harte, S., Chu, H., Chen, J., Desai, A. R., Dušek, J., Euskirchen, E. S., Fortuniak, K., Flanagan, L. B., Friborg, T., Grygoruk, M., Gogo, S., Grünwald, T., Hansen, B. U., Holl, D., Humphreys, E., Hurkuck, M., Kiely, G., Klatt, J., Kutzbach, L., Langeron, C., Laggoun-Défarge, F., Lund, M., Lafleur, P. M., Li, X., Mammarella, I., Merbold, L., Nilsson, M. B., Olejnik, J., Ottosson-Löfvenius, M., Oechel, W., Parmentier, F.-J. W., Peichl, M., Pirk, N., Peltola, O., Pawlak, W., Rasse, D., Rinne, J., Shaver, G., Schmid, H. P., Sottocornola, M., Steinbrecher, R., Sachs, T., Urbaniak, M., Zona, D., and Ziemblinska, K.: ORCHIDEE-PEAT (revision 4596), a model for northern peatland CO<sub>2</sub>, water, and energy fluxes on daily to annual scales, *Geosci. Model Dev.* 11, 497-519, <https://doi.org/10.5194/gmd-11-497-2018>, 2018.
- Qiu, C., Zhu, D., Ciais, P., Guenet, B., Peng, S., Krinner, G., Tootchi, A., Ducharne, A., Hastie, A.: Modelling northern peatland area and carbon dynamics since the Holocene with the ORCHIDEE-PEAT land surface model (SVN r5488), *Geosci. Model Dev.* 12, 2961-2982, <https://doi.org/10.5194/gmd-12-2961-2019>, 2019.
- Raivonen, M., Smolander, S., Backman, L., Susiluoto, J., Aalto, T., Markkanen, T., Mäkelä, J., Rinne, J., Peltola, O., Aurela, M., Lohila, A., Tomasic, M., Li, X., Larmola, T., Juutinen, S., Tuittila, E.-S., Heimann, M., Sevanto, S., Kleinen, T., Brovkin, V., and Vesala, T.: HIMMELI v1.0: Helsinki Model of METHane build-up and emission for peatlands, *Geosci. Model Dev.* 10, 4665-4691, <https://doi.org/10.5194/gmd-10-4665-2017>, 2017.
- Raes, D., Steduto, P., Hsiao, T.C., Fereres, E.: AquaCrop Version 4.0: Chapter 3 Calculation Procedures, FAO. Land and Water Division, Rome, Italy, 2012.
- Ricciuto, D. M., Xu, X., Shi, X., Wang, Y., Song, X., Schadt, C. W., Griffiths, N.A., Mao, J., Warren, J.M., Thornton, P.E., Chanton, J., Keller, J.K., Bridgham, S.C., Gutknecht, J., Sebestyen, S.D., Finzi, A., Kolka, R., and Hanson, P.J.: An integrative model for soil biogeochemistry and methane processes: I. Model structure and sensitivity analysis. *Journal of Geophysical Research: Biogeosciences.* 126, e2019JG005468. <https://doi.org/10.1029/2019JG005468>, 2021.
- Riley, W.J., Subin, Z.M., Lawrence, D.M., Swenson, S.C., Torn, M.S., Meng, L., Mahowald, N.M., and Hess, P.: Barriers to predicting changes in global terrestrial methane fluxes: analyses using CLM4Me, a methane biogeochemistry model integrated in CESM, *Biogeosciences*, 8, 1925-1953, <https://doi.org/10.5194/bg-8-1925-2011>, 2011.

Salmon, E., Jégou, F., Guenet, B., Jourdain, L., Qiu, C., Bastrikov, V., Guimbaud, C., Zhu, D., Ciais, P., Peylin, P., Gogo, S., Laggoun-Défarge, F., Aurela, M., Bret-Harte, M. S., Chen, J., Chojnicki, B. H., Chu, H., Edgar, C. W., Euskirchen, E. S., Flanagan, L. B., Fortuniak, K., Holl, D., Klatt, J., Kolle, O., Kowalska, N., Kutzbach, L., Lohila, A., Merbold, L., Pawlak, W., Sachs, T., and Ziemblínska, K.: Assessing methane emissions for northern peatlands in ORCHIDEE-PEAT revision 7020, *Geosci. Model Dev*, 15, 2813-2838, <https://doi.org/10.5194/gmd-15-2813-2022>, 2022.

Sitch, S., Smith, B., Prentice, I.C., Arneth, A., Bondeau, A., Cramer, W., Kaplan, J.O., Levis, S., Lucht, W., Sykes, M. T., Thonicke, K., Venevsky, S.: Evaluation of ecosystem dynamics, plant geography and terrestrial carbon cycling in the LPJ dynamic global vegetation model, *Glob. Change Biol*, 9, 161-185, <https://doi.org/10.1046/j.1365-2486.2003.00569.x>, 2003.

Stange, F., Butterbach-Bahl, K., Papen, H., Zechmeister-Boltenstern, S., Li, C., and Aber, J.: A process-oriented model of N<sub>2</sub>O and NO emissions from forest soils: 2. Sensitivity analysis and validation, *J. Geophys. Res.*, 105 (D4), 4385-4398, <https://doi.org/10.1029/1999JD900948>, 2000.

Tang, J., Zhuang, Q., Shannon, R.D., and White, J. R.: Quantifying wetland methane emissions with process-based models of different complexities. *Biogeosciences*, 7, 3817-3837, <https://doi.org/10.5194/bg-7-3817-2010>, 2010.

Thornton, P.E., Lamarque, J-F., Rosenbloom, N.A., and Mahowald, N.M.: Influence of carbon-nitrogen cycle coupling on land model response to CO<sub>2</sub> fertilization and climate variability, *Global Biogeochem. Cycles*, 21, GB4018, <https://doi.org/10.1029/2006GB002868>, 2007.

van Huissteden, J., van den Bos, R., and Alvarez, I.M.: Modelling the effect of water-table management on CO<sub>2</sub> and CH<sub>4</sub> fluxes from peat soils, *Neth. J. Geosci.*, 85(1), 3-18, <https://doi.org/10.1017/S0016774600021399>, 2006.

van Huissteden, J., Petrescu, A.M.R., Hendriks, D.M.D., and Rebel, K.T.: Sensitivity analysis of a wetland methane emission model based on temperate and arctic wetland sites, *Biogeosciences*, 6, 3035-3051, <https://doi.org/10.5194/bg-6-3035-2009>, 2009.

Weaver, A. J., Eby, M., Wiebe, E. C., Bitz, C. M., Duffy, P. B., Ewen, T. L., Fanning, A. F., Holland, M. M., MacFayden, A., Matthews, H. D., Meissner, K. J., Saenko, O., Schmittner, A., Wang, H. and Yoshimori, M. The UVic Earth System Climate Model: Model description, climatology, and applications to past, present and future climates, *Atmosphere-Ocean*, 39, 361-428, <https://doi.org/10.1080/07055900.2001.9649686>, 2001.

Wang, Y., Yuan, F., Yuan, F., Gu, B., Hahn, M. S., Torn, M. S., Ricciuto, D. M., Kumar, J., He, L., Zona, D., Lipson, D.A., Wagner, R., Oechel, W.C., Wullschleger, S.D., Thornton, P.E., and Xu, F.: Mechanistic Modeling of Microtopographic Impacts on CO<sub>2</sub> and CH<sub>4</sub> Fluxes in an Alaskan Tundra Ecosystem Using the CLM-Microbe Model, *Journal of Advances in Modeling Earth Systems*, 11, 4288-4304, <https://doi.org/10.1029/2019MS001771>, 2019.

Wania, R., Ross, I., and Prentice, I.C.: Integrating peatlands and permafrost into a dynamic global vegetation model; 1, Evaluation and sensitivity of physical land surface processes, *Global Biogeochemical Cycles*, 23, GB3014. <https://doi.org/10.1029/2008GB003412>, 2009a

Wania, R., Ross, I., and Prentice, I. C.: Integrating peatlands and permafrost into a dynamic global vegetation model; 2, Evaluation and sensitivity of vegetation and carbon cycle processes, *Global Biogeochemical Cycles*, 23, GB3015. <https://doi.org/10.1029/2008GB003413>, 2009b.

Wania, R., Ross, I., and Prentice, I.C.: Implementation and evaluation of a new methane model within a dynamic global vegetation model: LPJ-WHyMe v1.3.1, *Geosci. Model Dev*, 3, 565-584, <https://doi.org/10.5194/gmd-3-565-2010>, 2010.

Xu, X., Elias, D. A., Graham, D. E., Phelps, T. J., Carroll, S. L., Wullschleger, S. D., and Thornton, P.E.: A microbial functional group-based module for simulating methane production and consumption: Application to an incubated permafrost soil, *Journal of Geophysical Research: Biogeosciences*, 120, 1315-1333, <https://doi.org/10.1002/2015JG002935>, 2015.



Yuan, F., Wang, Y., Ricciuto, D.M., Shi, X., Yuan, F., Brehme, T., Bridgham, S., Keller, J., Warren, J.M., Griffiths, N.A., Sebestyen, S.D., Hanson, P.J., Thornton, P.E., and Xu, X.: Hydrological feedback on peatland CH<sub>4</sub> emission under warming and elevated CO<sub>2</sub>: A modeling study, *Journal of Hydrology*, 603-part D, 127137, <https://doi.org/10.1016/j.jhydrol.2021.127137>, 2021.

Zhang, Y., Li, C., Zhou, X., and Moore, B.: A simulation model linking crop growth and soil biogeochemistry for sustainable agriculture, *Ecological Modelling*, 151(1), 75-108, [https://doi.org/10.1016/S0304-3800\(01\)00527-0](https://doi.org/10.1016/S0304-3800(01)00527-0), 2002.

Zhang, Y., Li, C., Trettin, C.C., Li, H., G. and Sun, G.: An integrated model of soil, hydrology, and vegetation for carbon dynamics in wetland ecosystems, *Global Biogeochem. Cycles*, 16(4), 1061, <https://doi.org/10.1029/2001GB001838>, 2002.

Zhuang, Q., Melillo, J.M., Kicklighter, D.W., Prinn, R.G., McGuire, A.D., Steudler, P.A., Felzer, B.S., and Hu, S.: Methane fluxes between terrestrial ecosystems and the atmosphere at northern high latitudes during the past century: A retrospective analysis with a process-based biogeochemistry model, *Global Biogeochemical Cycles*, 18, GB3010, <https://doi.org/10.1029/2004GB002239>, 2004.

Zhuang, Q., Melillo, J., McGuire, A., Kicklighter, D., Prinn, R., Steudler, P., Felzer, B., and Hu, S. Net emissions of CH<sub>4</sub> and CO<sub>2</sub> in Alaska: Implications for the region's greenhouse gas budget, *Ecol. Appl.*, 17, 203-212, [https://doi.org/10.1890/1051-0761\(2007\)017\[0203:NEOCAC\]2.0.CO;2](https://doi.org/10.1890/1051-0761(2007)017[0203:NEOCAC]2.0.CO;2), 2007.

Zhu, Q., Liu, J., Peng, C., Chen, H., Fang, X., Jiang, H., Yang, G., Zhu, D., Wang, W., and Zhou, X.: Modelling methane emissions from natural wetlands by development and application of the TRIPLEX-GHG model, *Geosci. Model Dev*, 7, 981-999, <https://doi.org/10.5194/gmd-7-981-2014>, 2014.

Zuo, Y., Wang, Y., He, L., Wang, N., Liu, J., Yuan, F., Li, K., Guo, Z., Sun, Y., Zhu, X., Zhang, L., Song, C., Sun, Li., and Xu, X.: Modelling methane dynamics in three wetlands in Northeastern China by using the CLM-Microbe model, *Ecosystem Health and Sustainability*, 8(1), 2074895, <https://doi.org/10.1080/20964129.2022.2074895>, 2022.
