# Supplementary material for: Review and Synthesis: Peatland and Wetland Models Simulating CH 4 Production, CH 4 Oxidation and CH 4 Transport Pathways
Source: Copernicus journal article supplement (doi:10.5194/egusphere-2024-3852), 2024-12-17
Supplement: Supplementary file [file egusphere-2024-3852-RC1-supplement.pdf]

# Review and Synthesis: Peatland and Wetland Models Simulating CH<sub>4</sub> Production, CH<sub>4</sub> Oxidation and CH<sub>4</sub> Transport Pathways

Amey S. Tilak<sup>1</sup>, Alina Premrov<sup>2,7</sup>, Ruchita Ingle<sup>3</sup>, Nigel Roulet<sup>4</sup>, Benjamin R.K. Runkle<sup>5</sup>, Matthew Saunders<sup>2</sup>, Avni Malhotra<sup>6</sup> and Kenneth A. Byrne<sup>1</sup>

5

<sup>1</sup> Department of Biological Sciences, University of Limerick, Limerick, Ireland ([amey.tilak@ul.ie](mailto:amey.tilak@ul.ie), [ken.byrne@ul.ie](mailto:ken.byrne@ul.ie))

<sup>2</sup> Botany School of Natural Sciences, Trinity College Dublin, Dublin, Ireland ([apremrov@tcd.ie](mailto:apremrov@tcd.ie), [saundem@tcd.ie](mailto:saundem@tcd.ie))

<sup>3</sup> Department of Environmental Sciences, Wageningen University, Netherlands ([ruchita.ingle@wur.nl](mailto:ruchita.ingle@wur.nl)).

<sup>4</sup> Department of Geography, McGill University, Montreal, Canada ([nigel.roulet@mcgill.ca](mailto:nigel.roulet@mcgill.ca))

10 <sup>5</sup> Department of Biological and Agricultural Engineering, University of Arkansas, Fayetteville, AR, USA  
([brrunkle@uark.edu](mailto:brrunkle@uark.edu))

<sup>6</sup> Pacific Northwest National Laboratory, Richland, USA ([avni.malhotra@pnnl.gov](mailto:avni.malhotra@pnnl.gov)).

<sup>7</sup> Department of Environmental Science, Faculty of Science, Atlantic Technological University, Sligo, Ireland  
([alina.premrov@atu.ie](mailto:alina.premrov@atu.ie))

15 *First author:* [amey.tilak@ul.ie](mailto:amey.tilak@ul.ie) and *Corresponding authors:* Kenneth A. Byrne ([ken.byrne@ul.ie](mailto:ken.byrne@ul.ie)) and Avni Malhotra  
([avni.malhotra@pnnl.gov](mailto:avni.malhotra@pnnl.gov))

**Abstract.** Peatlands play an important role in the global CH<sub>4</sub> cycle and models are key tools to assess global change effects on CH<sub>4</sub> processes. It remains unclear how well our existing wetland modelling frameworks are suited to peatland questions. Therefore, we reviewed 16 peatland or wetland models operating at different spatial (seconds-to-decadal) and temporal (soil core-to-global) scales, having different spin-up periods for carbon pool stabilization and various CH<sub>4</sub> production, oxidation and transport processes. Through a literature review, model specific advantages and limitations, common and specific driving inputs of all models and critical inputs of individual models impacting CH<sub>4</sub> plant-mediated transport, diffusion and ebullition were summarized. The 16 reviewed models were qualitatively ranked 0 to 4 (none-to-full process representations) with respect to CH<sub>4</sub> production, oxidation and transport. The most common temporal and spatial scale for 14 models was daily time-step and field scale respectively, while the spin-up stabilization periods of different carbon pools (peat, litter, roots, exudates, microbial, humus, slow, fast) of all models range from 1 to 90102 years. With regards to CH<sub>4</sub> production and oxidation, 50% of reviewed models (Ecosys, CLM-Microbe, ELM-Spruce, Peatland-VU, Wetland-DNDC, TRIPLEX-GHG, TEM, CLM4Me) exhibited full to adequate process representation. Meanwhile 44, 44 and 25% models exhibited full to adequate process representation for plant mediated transport, diffusion and ebullition respectively. This meant there is ample scope to improve ebullition processes in the remaining 75% models. We conclude that existing models are adequate for site-level CH<sub>4</sub> flux assessments but may lack a predictive understanding of CH<sub>4</sub> production pathways.

## 1 Introduction

Northern peatlands contain partially decomposed plant derived organic matter that has accumulated over millennial time scales, due to the continuously water-logged conditions, acidic soils and low air temperatures (Nichols and Peteet, 2019; Hugelius et al., 2020; Loisel and Gallego-Sala, 2022). These waterlogged conditions drastically slow down the decomposition of organic matter, resulting in net accumulation of peat (Hugelius et al., 2020; Qiu et al., 2020; Qiu et al., 2021). Although peatlands cover 3% of the global land area they store twice as much carbon as the world's forest (Humpenöder et al., 2020; Loisel and Gallego-Sala, 2022). Globally, 600 ± 100 Pg C is stored in peatlands (Leifeld and Menichetti, 2018; Leifeld et al., 2019; Nichols and Peteet, 2019). However, during the last century, peatlands across the globe have been drained and degraded and converted into agricultural lands, grasslands and croplands, releasing stored carbon as CO<sub>2</sub> (Abdalla et al., 2016; Fluet-Chouinard et al., 2023). To mitigate CO<sub>2</sub> losses to the atmosphere, peatlands are being rewetted by raising the water levels closer to the soil surface to enable continuous anaerobic conditions for carbon

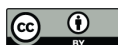

sequestration (Leifeld et al., 2019). Even though peatland rewetting most commonly decreases net CO<sub>2</sub> emissions, it simultaneously increases CH<sub>4</sub> emissions (Abdalla et al., 2016; Günter et al., 2020). This tradeoff is important since CH<sub>4</sub> is the second most potent greenhouse gas (GHG), having 34 times stronger radiative forcing compared to CO<sub>2</sub>, but a shorter lifetime (12 years) compared to CO<sub>2</sub> (300-1000 years) (Abdalla et al., 2016). Furthermore, CH<sub>4</sub> fluxes from rewetted peatlands are spatially and temporally variable and driven by peat depth, vegetation types, microbial compositions, peat and air temperatures, precipitation and resulting water table depths (Wilson et al., 2015; Abdalla et al., 2016; Vroom et al., 2022; Ge et al., 2024).

The two most common monitoring approaches that are utilized to measure CH<sub>4</sub> fluxes from peatlands and wetlands are the top-down and bottom-up approaches (Ma et al., 2021; Erland et al., 2022; Liu et al., 2023; McNicol et al., 2023; Forbich et al., 2024). Bottom-up measurement approaches typically quantify spatial and temporal trends in CH<sub>4</sub> fluxes via chamber measurements with known area and volume (Hutchinson and Livingston, 2002; Kutzbach et al., 2007; Hendriks et al., 2007; Schrier-Uijl et al., 2010) and continuous eddy covariance (EC) measurements (Baldocchi et al., 2001a; Denmead, 2008; Oertel et al., 2012). **Although chamber measurements quantify CH<sub>4</sub> fluxes from specific source areas, they require multiple replications to capture spatial and temporal variations and often do not provide continuous flux data, while the EC method provides continuous temporal CH<sub>4</sub> flux data, but these measurements are not easily attributable to a specific microsite type (Erland et al., 2022).** Automated chambers of different designs (Courtois et al., 2019; Mander et al., 2022) also measure CH<sub>4</sub> fluxes at a sub-daily temporal resolution and are utilized to capture hot moments from a known source area, typically not captured by manual chamber and EC methods (Zhao et al., 2024). The top-down approach utilizes atmospheric observations of CH<sub>4</sub> concentrations combined with models that account for atmospheric transport from an emitting to an observation location (NASEM, 2018; Erland et al., 2022). The different top-down approaches that are generally utilized are remote observations, towers, aircraft, and satellites (Tedeschi et al., 2022). However, for predicting future wetland/peatland CH<sub>4</sub> fluxes under a range of climatic and environmental conditions, computer models are parametrized against measured CH<sub>4</sub> fluxes and in-situ environmental data to minimize the error between simulated and measured fluxes (Grant, 1998; Grant, 1999; Xu et al., 2016; Morin et al., 2022). Models are also utilized to enhance the understanding of various processes occurring in different peatlands and wetlands such as the CH<sub>4</sub> production, CH<sub>4</sub> oxidation and CH<sub>4</sub> transport (plant-mediated, diffusion and ebullition) (Tang et al., 2010; Riley et al., 2011; Zhang et al., 2022). The other important goal of developing models is identifying the critical inputs that influence modelled outputs related to CH<sub>4</sub> production, CH<sub>4</sub> oxidation and CH<sub>4</sub> transport pathways to improve the process understanding (Xu et al., 2016; Mozafari et al., 2023).

The recent reviews of CH<sub>4</sub>-relevant models by Xu et al. (2016) and Mozafari et al. (2023) highlighted and discussed the processes of methanogenesis, methanotrophy and CH<sub>4</sub> transport pathways of different terrestrial models impacted by their associated environmental conditions and differentiated 45 peatland and wetland models that simulated CH<sub>4</sub> production, CH<sub>4</sub> oxidation and CH<sub>4</sub> transport into four categories: 1) terrestrial ecosystem models simulating biogeochemical and vegetation dynamics, 2) hydrological models, 3) land surface models, 4) ecohydrological models simulating bogs and fens in the Northern hemisphere respectively. Meanwhile Forbich et al. (2024) provided an historical overview on inclusion of wetland CH<sub>4</sub> components in Earth system models (ESMs), discussed how CH<sub>4</sub> modelling approaches evolved over time and highlighted the knowledge gaps and challenges faced in accurately estimating CH<sub>4</sub> fluxes. However, it remains unclear as to what extent these models could be used for peatland applications. Furthermore, it remains unclear whether these models represent peatland relevant processes and inputs for CH<sub>4</sub>. Across peatland applications, future users of models require information on relevant spatial-temporal scales, key model inputs (to ensure that they have corresponding measurements) and on process representation. Therefore, the goals of this review are to synthesize the attributes, strengths and weaknesses of existing models that could be applied to peatland CH<sub>4</sub> questions. Specifically, we: a) summarize the spatial and temporal operating scales and spin-up stabilization periods of different carbon pools; b) identify the model driving inputs that are common and separate to all reviewed models; c) summarize models simulating one or two or three CH<sub>4</sub> transport pathways i.e., plant mediation, diffusion and ebullition; d) qualitatively rank the process representations in each model for CH<sub>4</sub> production, CH<sub>4</sub> oxidation and CH<sub>4</sub> transport; e) summarize the advantages and limitations of each reviewed model; e) synthesize the critical model inputs impacting individual plant-mediation, diffusion and ebullition. ~~We hope this review enables new model users to decide which model suits their needs best, but also~~ provide a synthesis of CH<sub>4</sub> process representation across reviewed models.

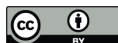

## 95 2 Materials and Methods

### 2.1 Identifying models simulating CH<sub>4</sub> processes

We identified models that simulated CH<sub>4</sub> production, CH<sub>4</sub> oxidation and CH<sub>4</sub> transport (plant-mediated, ebullition and diffusion) in peatland and wetland environments using “Google Scholar” and “Web of Science” having the following search key words: a) models simulating CH<sub>4</sub> fluxes peatlands and wetlands; b) models simulating CH<sub>4</sub> transport pathways peatlands and wetlands; c) process based CH<sub>4</sub> models peatlands and wetlands; d) mechanistic models simulating CH<sub>4</sub> fluxes peatlands and wetlands; d) microbial models simulating CH<sub>4</sub> fluxes peatlands and wetlands; e) biogeochemical models simulating CH<sub>4</sub> fluxes peatlands and wetlands and f) dynamic global vegetation models simulating CH<sub>4</sub> fluxes peatlands and wetlands. Each key word resulted in a plethora of published papers, technical reports, documentation, non-peer-reviewed papers, grey literature (reports, policy documents, technical notes) and inaccessible full text papers respectively. Non-peer reviewed papers, grey literature and inaccessible full-text papers were not considered in this review.

### 2.2 CH<sub>4</sub> model selection and review

From each key word or phrase, peer reviewed published papers associated with each model were identified i.e., model specific development papers, model application papers, model review papers and technical model documentation. Also, models were only chosen if they were written in English and published from 1997 to 2022. Model documents pertinent to the above-mentioned criteria were manually screened, identified and selected. Statistical or black box models simulating CH<sub>4</sub> fluxes in peatlands and wetlands were not considered in this review. This review specifically focused on identifying models that are process based, mechanistic and microbial, operating at the plot, field, regional, national and global scales that simulated all three CH<sub>4</sub> transport pathways (plant transport, ebullition, and diffusion), at least two CH<sub>4</sub> transport pathways or simulated total CH<sub>4</sub> flux. From these above-mentioned criteria, 10 models were selected (Table 1). Firstly, we distinguish the spatial and temporal operating scale of each model, quantify the spin-up period required to stabilize different carbon pools for each model, summarize models simulating one or two or three CH<sub>4</sub> transport pathways and qualitatively rank each model into five process representation categories from 0 to 4, with the rank 0 having no process representation, rank 1 minimal process representation, rank 2 intermediate process representation, rank 3 adequate process representation and rank 4 full process representation with respect to CH<sub>4</sub> production, CH<sub>4</sub> oxidation, CH<sub>4</sub> plant transport, CH<sub>4</sub> diffusion and CH<sub>4</sub> ebullition. The no process representation implies that the specific peatland or wetland model does not incorporate any processes or mechanisms simulating CH<sub>4</sub> production, oxidation and transport. In case of the minimal process representation, the specific peatland or wetland model exhibits simplified representation of CH<sub>4</sub> fluxes without quantifying in detail the different CH<sub>4</sub> production, and oxidation pathways, while the transport process are only described using rate coefficients. Models with intermediate process representation incorporate some degree of CH<sub>4</sub> production and oxidation, while CH<sub>4</sub> transport is described based on rate coefficients and CH<sub>4</sub> concentrations supporting bubbling, minimum and threshold CH<sub>4</sub> concentrations and vegetation specific CH<sub>4</sub> transport and oxidation factors. The adequate process representation quantifies different CH<sub>4</sub> production, oxidation and transport pathways (Zhuang et al., 2004; Zhu et al., 2014; Salmon et al., 2022), while full process representation quantifies detailed microbial CH<sub>4</sub> production and oxidation processes (Grant and Roulet, 2002; Xu et al., 2015; Wang et al., 2019; Ricciuto et al., 2021). A concise description of all the reviewed models is available in the Supplementary material.

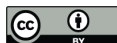

140 **Table 1.** Selected peatland or wetland model and their references.

| Model name                        | Model references                                                                                                                                                                                                                                       |
|-----------------------------------|--------------------------------------------------------------------------------------------------------------------------------------------------------------------------------------------------------------------------------------------------------|
| CLM-Microbe                       | Xu et al. (2015) ; Wang et al. (2019) ; He et al. (2021) ; Zuo et al. (2022); He et al. (2024)                                                                                                                                                         |
| HIMMELI                           | Raivonen et al. (2017)                                                                                                                                                                                                                                 |
| Peatland-VU                       | van Huissteden et al. (2006); van Huissteden et al. (2009); Petrescu et al. (2010); Budishchev et al. (2014); Mi et al. (2014); Lippmann et al. (2023)                                                                                                 |
| Wetland-DNDC                      | Li et al. (1992a), Li et al. (1992b) ; Li (2000) ; Zhang et al. (2002) ; Gilhespy et al. (2014) ; Deng et al. (2015); Webster et al. (2013) ; Taft et al. (2019)                                                                                       |
| TRIPLEX-GHG                       | Zhu et al. (2014) ; Zhu et al. (2016); Zhu et al. (2017)                                                                                                                                                                                               |
| WETMETH                           | Nzotungicimpaye et al. (2021)                                                                                                                                                                                                                          |
| ORCHIDEE model (various versions) | Largerion et al. (2018) : high-latitude-ORC-HL-PEAT; Qiu et al. (2018) : revision 4596 ; Giumberteau et al. (2018) : MICT (v.8.4.1) ; Qiu et al. (2019) : PEAT land surface model (SVN r5488) ; Salmon et al. (2022): revision 7020-PCH <sub>4</sub> , |
| BASGRA-BGC                        | Huang et al. (2021)                                                                                                                                                                                                                                    |
| TEM                               | Zhuang et al. (2004) ; Zhuang et al. (2010) ; Tang et al. (2010) ; Li et al. (2020)                                                                                                                                                                    |
| Ecosys                            | Grant and Roulet (2002) ; Grant et al. (2015a) ; Grant (2015b) ; Grant et al. (2017a); Grant et al. (2017b) ; Chang et al. (2019)                                                                                                                      |
| LPJWhyMe                          | Wania et al. (2009a) ; Wania et al. (2009b); Wania et al. (2010)                                                                                                                                                                                       |
| MEM                               | Lai (2009)                                                                                                                                                                                                                                             |
| CH4MOD                            | Li et al. (2010) ; Li et al. (2012) ; Li et al. (2016) ; Li et al. (2017), Li et al. (2019); Li et al. (2020); Zhang et al. (2020);                                                                                                                    |
| PEPRMT                            | Oikawa et al. (2017) ; Fertitta-Roberts et al. (2019); Mack et al. (2023)                                                                                                                                                                              |
| ELM-SPRUCE                        | Xu et al. (2015) ; Shi et al. (2015) ; Hanson et al. (2020) ; Yuan et al. (2021); Wang et al. (2019); Ricciuto et al. (2021)                                                                                                                           |
| CLM4Me                            | Oleson et al. (2010) ; Lawrence et al. (2011); Riley et al. (2011)                                                                                                                                                                                     |

### 3 Results

#### 3.1 Model temporal and spatial scales

145 The reviewed peatland or wetland models operate at different temporal scales. For example, Ecosys (Grant and Roulet, 2002; Grant et al., 2012; Grant et al., 2017a, b) operates at seconds and hourly time scale, while HIMMELI (Raivonen et al., 2017) and ORCHIDEE-PCH<sub>4</sub> (Salmon et al., 2022) operate at half-hourly time scale, PEPRMT (Oikawa et al., 2017) operate at daily time scale and CLM-Microbe (Xu et al., 2015 ; Wang et al., 2019), TEM (Zhuang et al., 2004), ELM-Spruce (Xu et al., 2015 ; He et al., 2020 ; Yuan et al., 2021 ; Wang et al., 2019) and Ecosys operate at hourly time scale (Table 2).  
 150 However, the most widely utilized temporal scale for 14 out of 16 models was the daily-time step. With regards to spatial operating scale, CLM-Microbe operates at lab, plot and field scale, while the most widely utilized spatial scale for 14 out of 16 models was field scale (Table 2).

#### 3.2 Model spin-up times for stabilizing different carbon pools

155 The spin-up time required for stabilization of different carbon pools for all models ranged from 7 to 90102 years (Fig. 1). For example, HIMMELI, which is not embedded into any peatland carbon model requires seven-spin-up years to stabilize peat CH<sub>4</sub> concentrations (Raivonen et al., 2017). Peatland-VU (van Huissteden et al., 2006) requires 20-60 years for stabilizing different carbon pools such as peat, litter, roots, exudates, microbial and humus (personal communications, Tanya Lippmann, 2022). However, Wetland-DNDC (Zhang et al., 2002) requires 20-200 years of spin-up to stabilize soil organic carbon (SOC), soil N pools and soil water filled pore spaces (WFPS) (Webster et al., 2013; Deng et al., 2015; Taft et al.,  
 160 2019). The exact number of years for stabilizing different carbon pools in Peatland-VU and Wetland-DNDC depends upon



165 the site-specific climate, soils, vegetation and local environmental conditions. Models such as Ecosys (Grant and Roulet, 2002), ORCHIDEE (peat land surface, MICT, Peat-4596, PCH<sub>4</sub>) (Largeron et al., 2018; Qiu et al., 2018; Giumberteau et al., 2019), TEM (Zhuang et al., 2010; Li et al., 2020) and TRIPLEX-GHG (Zhu et al., 2014) require 41-300 years spin-up to stabilize hydrology, soil thermal regimes, soil moisture, C in dead plants and vegetation productivity (Fig. 1). However, the spin-up time of ORCHIDEE-PCH<sub>4</sub> varies depending on the site type i.e., bog vs. fen vs. marsh. For example, the spin-up period for carbon pool stabilization at Winous Point Marsh site, USA was 32 years, while it was 10060 years at a fen site in Germany (Salmon et al., 2022). Qiu et al. (2018) utilized ORCHIDEE-PEAT (revision 4596) at 30 peatland sites located in boreal, temperate, arctic and arctic permafrost and the spin-up time to stabilize carbon pools was 10100 years. Models like 170 CLM4Me (Riley et al., 2011), LPJWhyMe (Wania et al., 2010) and ELM-SPRUCE (Ricciuto et al., 2021) have spin-up times of 1500, 1000 and 1250 years respectively. Spin-up times in CLM4Me (Riley et al., 2011) consists of: 1) 500 years spin-up using atmospheric data and 2) 1000 years spin-up subject to land use, N and aerosol deposition. In LPJWhyMe (Wania et al., 2010), 1000 years spin-up implemented using climate data such as air temperature, cloud cover, monthly total precipitation and monthly number of wet days, while in ELM-SPRUCE (Ricciuto et al., 2021), four soil carbon pools and 175 three litter pools were stabilized for 1250 years. However, carbon pool stabilization in LPJWhyMe requires 90000 years spin-up +102 years of transient runs (Wania et al., 2009b). The carbon pool stabilization in CLM-Microbe varies for different biomes, e.g., tropical and temperate 1500 years spin-up, boreal and arctic 2000 years and wetlands 3000 years (Fig. 1; He et al., 2023). Meanwhile the stabilization in WETMETH consists of three phases: 1) 5000 years spin-up for climate state equilibrium; 2) 169 years transient runs of CO<sub>2</sub> concentrations and 3) site-specific runs based on measured data 180 (Nzotungicimpaye et al., 2021). However, no information on carbon pool stabilization is provided for MEM (Lai, 2009), CH4MOD (Li et al., 2010) and PEPRMT (Oikawa et al., 2017) as of October 22, 2024.

185

190

195

200

205

**Table 2.** Temporal and spatial operating scales of 16 peatland or wetland models.

| Spatial scales                       | Peatland or Wetland Models |                                                                                                                                                 | Temporal scales |  | Peatland or Wetland Models                                                                                                               |  |
|--------------------------------------|----------------------------|-------------------------------------------------------------------------------------------------------------------------------------------------|-----------------|--|------------------------------------------------------------------------------------------------------------------------------------------|--|
|                                      |                            | Ecosys                                                                                                                                          | Lab             |  |                                                                                                                                          |  |
| <b>Seconds</b><br><b>Half hourly</b> |                            | HIMMELI, ORCHIDEE-PCH4                                                                                                                          | <b>Plot</b>     |  | CLM-Microbe, HIMMELI, Peatland-VU, Ecosys, ELM-SPRUCE                                                                                    |  |
| <b>Hourly</b>                        |                            | CLM-Microbe, TEM, Ecosys, ELM-SPRUCE                                                                                                            | <b>Field</b>    |  | CLM-Microbe, Peatland-VU, TRIPLEX-GHG, TEM, LPJWhyMe, MEM, ELM-SPRUCE, HIMMELI, Wetland-DNDC, BASGRA-BGC, Ecosys, CH4MOD, PEPRMT, CLM4Me |  |
| <b>Daily</b>                         |                            | CLM-Microbe, Peatland-VU, TRIPLEX-GHG, BASGRA-BGC, LPJWhyMe, PEPRMT, CLM4Me, HIMMELI, Wetland-DNDC, ORCHIDEE-PCH4, TEM, MEM, CH4MOD, ELM-SPRUCE | <b>Regional</b> |  | TRIPLEX-GHG, WETMETH, ORCHIDEE-PCH4, TEM, CLM4Me                                                                                         |  |
| <b>Monthly</b>                       |                            | TRIPLEX-GHG, LPJWhyMe, CLM4Me                                                                                                                   | <b>National</b> |  | TRIPLEX-GHG, WETMETH, ORCHIDEE-PCH4, TEM, CLM4Me                                                                                         |  |
| <b>Seasonal</b>                      |                            | WETMETH                                                                                                                                         | <b>Global</b>   |  | TRIPLEX-GHG, WETMETH, ORCHIDEE-PCH4, TEM, CLM4Me                                                                                         |  |
| <b>Yearly</b>                        |                            | WETMETH, LPJWhyMe                                                                                                                               |                 |  |                                                                                                                                          |  |
| <b>Decadal</b>                       |                            | WETMETH                                                                                                                                         |                 |  |                                                                                                                                          |  |

210

215

220



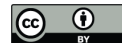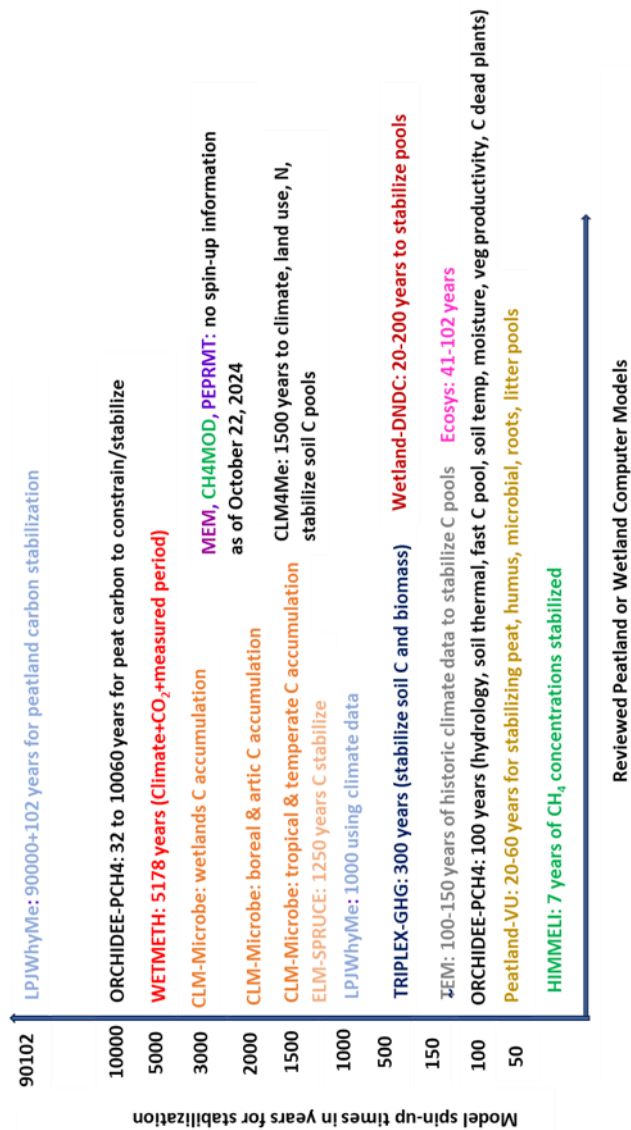

**Figure 1.** Spin-up times in terms of stabilizing different carbon pools for all reviewed wetland or peatland models. Each model has its own unique color for easy identification. Also, a single model can possess different time scales, e.g., CLM-Microbe having different C stabilization periods for tropical, temperate, and arctic ecosystems.

225

230

235



### 240 3.3 Common model driving inputs

Each of the selected peatland or wetland models (Table 1) was manually screened to identify driving inputs common to all models with respect to climate, hydrology, peat physical and chemical and different vegetation species (Table 3). Generally, climate inputs are easily available from on-site measurements or global databases (NCAR climate data, Copernicus, Europe, NASA Climate data services, NOAA Climate data and local databases (Irish Metrological Service and United States Environmental Protection Agency). The hydrological and peat physical and chemical data (Table 3) can be obtained from literature, laboratory and site-specific field measurements.

### 3.4 Model specific driving inputs

The number of model inputs (Table 4) are generally proportional to how comprehensively each model simulates the intricacies of processes like hydrology, soil physical, soil chemical, soil microbial processes and vegetation dynamics. For example, CLM-Microbe (Xu et al., 2015; Wang et al., 2019) and Ecosys (Grant and Roulet, 2002; Grant, 2015; Grant et al., 2015) and ELM-SPRUCE (Ricciuto et al., 2021; Yuan et al., 2021) require extensive microbial inputs (growth, death rates and temperature sensitivity of acetoclastic methanogens, aerobic methanotroph and growth rate H<sub>2</sub>-CO<sub>2</sub>-dependent methanogens) compared to MEM (Lai, 2009) which only requires acrotelm and catotelm depth, decomposition rates and carbon to peat ratio. Models like Peatland-VU, Wetland-DNDC, TRIPLEX-GHG, BASGRA-BGC, ORCHIDEE-PCH<sub>4</sub>, LPJWhyMe and CH<sub>4</sub>MOD utilize different decomposition rates for different carbon pools (humus, peat, roots and litter, exudates, slow and fast carbon pools) which are rarely available from site-specific measured data, instead, they are fine-tuned during model parametrization (van Huissteden et al., 2006; Webster et al., 2013 ; Li et al., 2004a ; Zhang et al., 2002; Zhu et al., 2014 ; Zhu et al., 2016 ; Zhu et al., 2017; Salmon et al., 2022; Huang et al., 2021; Wania et al., 2010; Li et al., 2010 ; 2016 ; 2020 ; Zhang et al., 2020). Also, inputs related to CH<sub>4</sub> transport such as plant-mediated transport, CH<sub>4</sub> oxidized during plant transport, ebullition and diffusion rate coefficients are not measured at all peatland and wetland sites but fine-tuned to minimize the error between simulated and measured CH<sub>4</sub> fluxes. The model specific driving inputs that are generally available from site-specific studies are specific leaf area, harvested above-ground biomass, maximum and minimum vegetation growth rates, rooting depth, peat thickness, initial peat carbon levels, growing degree days, standing water above peat surface, s, leaf and litter C and N, lignin concentration in litter and C:N ratio.

270

275

280



**Table 3.** Driving inputs common across peatland or wetland CH<sub>4</sub> models (for individual model references see Table 1).

| <b>Climate inputs</b>       | <b>Hydrological inputs</b>             | <b>Physical &amp; Chemical inputs</b>                  | <b>Vegetation inputs</b>                                          |
|-----------------------------|----------------------------------------|--------------------------------------------------------|-------------------------------------------------------------------|
| Precipitation               | Water table depths                     | No of peat layers & individual depths                  | Leaf area index,                                                  |
| Evapotranspiration          | Peat moisture in different depths      | Initial soil organic C all peat depths                 | Specific leaf area,                                               |
| Air temperature             | Surface flow inputs (runoff)           | pH all peat depths                                     | Max root depth, length, & tortuosity                              |
| Solar radiation             | Hydraulic conductivity all peat layers | Bulk density all peat depths                           | Plant functional types (PFTs),                                    |
| Short & long wave radiation | Porosity all peat layers               | Peat temperature all peat depths                       | Above & below ground biomass, its C: N concentrations             |
| Wind speed                  | Field capacity all peat layers         | C:N ratios all peat depths                             | Litter C & N concentrations                                       |
| Humidity                    | Wilting point all peat layers          | Soil CH <sub>4</sub> concentrations each peat layer    | Initial senescence rates/scalars and above & below ground biomass |
| Cloud cover                 | Volumetric water content               | Threshold CH <sub>4</sub> concentration for ebullition |                                                                   |
| Vapor pressure              |                                        |                                                        |                                                                   |

285

290

295

300

**Table 4.** Model specific driving inputs for reviewed peatland or wetland models.

| Model specific driving inputs                                                                                                                                                                                                                                                                                                                                                                                               |                                                                                                                                                                                                                                                                                 |                                                                                                                                                                                                                                                                                                                          |                                                                                                                                                                                                                                                                                                                                                                                                                                                                                                                                                                                                                                                           |
|-----------------------------------------------------------------------------------------------------------------------------------------------------------------------------------------------------------------------------------------------------------------------------------------------------------------------------------------------------------------------------------------------------------------------------|---------------------------------------------------------------------------------------------------------------------------------------------------------------------------------------------------------------------------------------------------------------------------------|--------------------------------------------------------------------------------------------------------------------------------------------------------------------------------------------------------------------------------------------------------------------------------------------------------------------------|-----------------------------------------------------------------------------------------------------------------------------------------------------------------------------------------------------------------------------------------------------------------------------------------------------------------------------------------------------------------------------------------------------------------------------------------------------------------------------------------------------------------------------------------------------------------------------------------------------------------------------------------------------------|
| CLM-Microbe (Xu et al., 2015 ; Wang et al., 2019)                                                                                                                                                                                                                                                                                                                                                                           | HIMMELI (Raivonen et al., 2017)                                                                                                                                                                                                                                                 | Peatland VU (van Huissteden et al., 2006 ; 2009)                                                                                                                                                                                                                                                                         | Wetland DNDC (Webster et al., 2013 ; Li et al., 2004a ; Zhang et al., 2002)                                                                                                                                                                                                                                                                                                                                                                                                                                                                                                                                                                               |
| <p>1) half-saturation coefficient of available carbon mineralization, 2) max rate of acetate production available carbon, 3) decomposition rate constant dissolved organic matter, 4) decomposition rate constant biomass of bacteria and fungi, 5) leaf N fraction Rubisco enzyme, 6) growth respiration parameter 7) methanogen growth &amp; death rates 8) plant mediated, diffusion &amp; ebullition rate constants</p> | <p>1) aerobic &amp; anaerobic respiration rate 2) CH<sub>4</sub> oxidation inputs (Michaelis-Menten) 3) methanogenesis sensitivity to O<sub>2</sub> inhibition, 4) root decay constant, 5) root tortuosity 6) ebullition &amp; diffusion constants &amp; specific leaf area</p> | <p>1) SOM decomposition constants (peat, humus), 2) min &amp; max primary production 3) carbon fraction each layer organic matter reservoir, 4) root and litter senescence 5) exudate factor 6) harvested biomass fraction 7) CH<sub>4</sub> oxidation &amp; production 8) CH<sub>4</sub> transport (rate constants)</p> | <p><b>TRIPLEX GHG</b><br/>                     (Zhu et al., 2014 ; Zhu et al., 2016 ; Zhu et al., 2017)</p> <p>1) diurnal temperature range<br/>                     2) wet day frequency,<br/>                     3) soil texture,<br/>                     4) plant functional types,<br/>                     5) topography (soils &amp; veg)<br/>                     6) decomposable, structural, and resistant carbon pool<br/>                     7) decomposition rates, protected slow pool, passive pool, and non-protected slow pool rates),<br/>                     8) CH<sub>4</sub> production, oxidation, and transport parameters.</p> |

315 **Table 4.** continued.

| <b>Model specific driving inputs</b>                                                                                                                                                                                                                                                                                                                                                                                               |                                                                                                                                                                                                                                                                                                                                                                                                                                                      |                                                                                                                                                                                                                                                                                                                                                                                                                                                                                                                                                                                                                |                                                                                                                                                                                                                                                                                                                                                                                                                                                                                                                                                                                                                                                     |                                                                                                                                                                                                                                                                                                                                                                                                                                                                                                                                                                                                                           |
|------------------------------------------------------------------------------------------------------------------------------------------------------------------------------------------------------------------------------------------------------------------------------------------------------------------------------------------------------------------------------------------------------------------------------------|------------------------------------------------------------------------------------------------------------------------------------------------------------------------------------------------------------------------------------------------------------------------------------------------------------------------------------------------------------------------------------------------------------------------------------------------------|----------------------------------------------------------------------------------------------------------------------------------------------------------------------------------------------------------------------------------------------------------------------------------------------------------------------------------------------------------------------------------------------------------------------------------------------------------------------------------------------------------------------------------------------------------------------------------------------------------------|-----------------------------------------------------------------------------------------------------------------------------------------------------------------------------------------------------------------------------------------------------------------------------------------------------------------------------------------------------------------------------------------------------------------------------------------------------------------------------------------------------------------------------------------------------------------------------------------------------------------------------------------------------|---------------------------------------------------------------------------------------------------------------------------------------------------------------------------------------------------------------------------------------------------------------------------------------------------------------------------------------------------------------------------------------------------------------------------------------------------------------------------------------------------------------------------------------------------------------------------------------------------------------------------|
| <p><b>WETMETH</b><br/>(Nzotungicimpaye et al., 2021)</p> <p>1) thickness of oxic-anoxic zone<br/>                     2) carbon content<br/>                     3) topographic maps (spatial wetland distribution)<br/>                     4) plant functional types<br/>                     5) CH<sub>4</sub> production (temperature coefficient)<br/>                     6) CH<sub>4</sub> oxidation scaling parameter.</p> | <p><b>ORCHIDEE-PCH<sub>4</sub></b><br/>(Salmon et al., 2022)</p> <p>1) plant functional types,<br/>                     2) CH<sub>4</sub> production &amp; oxidation,<br/>                     3) CH<sub>4</sub> transport (oxic: anoxic decomposition ratio, methanotrophy rate, root CH<sub>4</sub> oxidation, root depth, efficiency plant mediated CH<sub>4</sub> transport, moisture connectivity and CH<sub>4</sub> mixing ratio bubbles).</p> | <p><b>BASGRA-BGC</b><br/>(Huang et al., 2021)</p> <p>1) C &amp; N, root, leaf &amp; stem<br/>                     2) dissolved organic carbon,<br/>                     3) harvest date, fertilizer<br/>                     4) distance between two drainpipes, radius &amp; depth<br/>                     5) labile, very labile, and passive SOM constants,<br/>                     6) grass maintenance and growth respiration rates,<br/>                     7) oxidation &amp; production rates<br/>                     8) CH<sub>4</sub> rate constants plant transport, diffusion, ebullition.</p> | <p><b>Terrestrial Ecosystem Model (TEM)</b> (Zhuang et al., 2004 ; 2010 ; Tang et al., 2010)</p> <p>1) soil thermal conductivity<br/>                     2) soil heat capacity,<br/>                     3) soil C, N &amp; soil texture,<br/>                     4) vegetation (canopy water conductance, its max value &amp; leaf water potential)<br/>                     5) scalars: redox, pH, moisture, and soil temperature on CH<sub>4</sub> production and CH<sub>4</sub> oxidation<br/>                     6) CH<sub>4</sub> pathways (rate constants ebullition, plant transport, diffusion, root area, plant aerenchyma factor)</p> | <p><b>Ecosys</b> (Chang et al., 2019 ; Grant and Roulet, 2002 ; Grant, 2015 ; Grant et al., 2015 ; Bouskill et al., 2020)</p> <p>1) soil organic carbon, sand, silt content, field capacity, wilting point, hydraulic conductivity, grid cell slopes<br/>                     2) Atmospheric concentrations (O<sub>2</sub>, CO<sub>2</sub>, CH<sub>4</sub>, N<sub>2</sub>O)<br/>                     3) tillage, fertilization, irrigation &amp; harvesting inputs,<br/>                     4) plant &amp; microbial functional type (PFTs &amp; MFTs) inputs<br/>                     5) nutrient cycling (C, N, P)</p> |

320

325

330 **Table 4.** continued

| <b>Model specific driving inputs</b>                                                                                                                                                                                                                                                                  |                                                                                                                                                                                          |                                                                                                                                                                                                                                                                                                                                                                                                                                                                                                                                                                  |                                                                                                                                                                                                                                                               |                                                                                                                                                                                                                                                                                                                                                                                                                                                                                                                                                                                                                                                                                                                                                                                 |                                                                                                                                                                                                                                                                                                                                                                                                                                                                             |
|-------------------------------------------------------------------------------------------------------------------------------------------------------------------------------------------------------------------------------------------------------------------------------------------------------|------------------------------------------------------------------------------------------------------------------------------------------------------------------------------------------|------------------------------------------------------------------------------------------------------------------------------------------------------------------------------------------------------------------------------------------------------------------------------------------------------------------------------------------------------------------------------------------------------------------------------------------------------------------------------------------------------------------------------------------------------------------|---------------------------------------------------------------------------------------------------------------------------------------------------------------------------------------------------------------------------------------------------------------|---------------------------------------------------------------------------------------------------------------------------------------------------------------------------------------------------------------------------------------------------------------------------------------------------------------------------------------------------------------------------------------------------------------------------------------------------------------------------------------------------------------------------------------------------------------------------------------------------------------------------------------------------------------------------------------------------------------------------------------------------------------------------------|-----------------------------------------------------------------------------------------------------------------------------------------------------------------------------------------------------------------------------------------------------------------------------------------------------------------------------------------------------------------------------------------------------------------------------------------------------------------------------|
| <p><b>LPJWhyMe</b><br/>(Wania et al., 2010)</p> <p>1) inundation stress non-flood tolerant PFTs<br/>                     2) decomposition rates: fast &amp; slow carbon pools<br/>                     3) production &amp; oxidation inputs<br/>                     4) transport pathways inputs</p> | <p><b>Methane Emission Model (MEM)</b><br/>(Lai, 2009)</p> <p>1) acrotelm and catotelm (depth, decomposition, mineralization rates)<br/>                     2) carbon to peat ratio</p> | <p><b>CH4MOD</b><br/>(Li et al., 2010 ; 2016 ; 2020 ; Zhang et al., 2020)</p> <p>1) standing water depth;<br/>                     2) sand fraction,<br/>                     3) max above ground biomass<br/>                     4) growing degree days<br/>                     5) senescence degree day<br/>                     6) non-structural component of plant litter,<br/>                     7) SOM first order decay rate<br/>                     8) initial N &amp; lignin in litter<br/>                     9) plant carbohydrates amount</p> | <p><b>PEPRMT</b><br/>(Oikawa et al., 2017 ; Fertitta-Roberts et al., 2019)</p> <p>1) absorbed photosynthetically active radiation (APAR),<br/>                     2) initial soil organic carbon<br/>                     3) labile soil organic carbon.</p> | <p><b>ELM-SPRUCE</b><br/>(Xu et al., 2015 ; He et al., 2020 ; Yuan et al., 2021 ; Wang et al., 2019)</p> <p>1) observed GPP, NPP, plant biomass,<br/>                     2) DOC, acetate concentrations,<br/>                     3) initial N concentrations,<br/>                     4) bacterial and fungal turnover rates,<br/>                     5) growth &amp; death rates methanotrophs, methanogen,<br/>                     6) minimum CH<sub>4</sub> solubility,<br/>                     7) dissolved organic matter turnover rate.<br/>                     8) maximum acetate production rate<br/>                     9) half-saturation coefficient available carbon mineralization<br/>                     10) dissolved organic matter turnover rate</p> | <p><b>CLM4Me</b><br/>(Lawrence et al., 2011 ; Oleson et al., 2010 ; Riley et al., 2011)</p> <p>1) CH<sub>4</sub> production (Q10 &amp; pH impact)<br/>                     2) CH<sub>4</sub> oxidation (max oxidation rate)<br/>                     3) O<sub>2</sub> &amp; CH<sub>4</sub> half-saturation oxidation coefficients<br/>                     4) CH<sub>4</sub> transport parameters (aerenchyma radius, porosity, CH<sub>4</sub> concentration threshold)</p> |

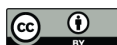

### 3.5 Models simulating CH<sub>4</sub> transport pathways

Out of 16 reviewed models, 12 models simulate all three CH<sub>4</sub> transport pathways of plant-mediated, ebullition and diffusion (Fig. 2). MEM only simulates diffusion and ebullition but not plant-mediated transport (Lai, 2009) while CH<sub>4</sub>MOD only simulates plant-mediated transport and ebullition, but not diffusion (Li et al., 2010; 2016; 2017). The PEPRMT (Oikawa et al., 2017) simulates plant-mediated transport and diffusion but not ebullition, while WETMETH does not simulate any CH<sub>4</sub> transport pathways, but rather simulates total CH<sub>4</sub> flux (Nzotungicimpaye et al., 2021).

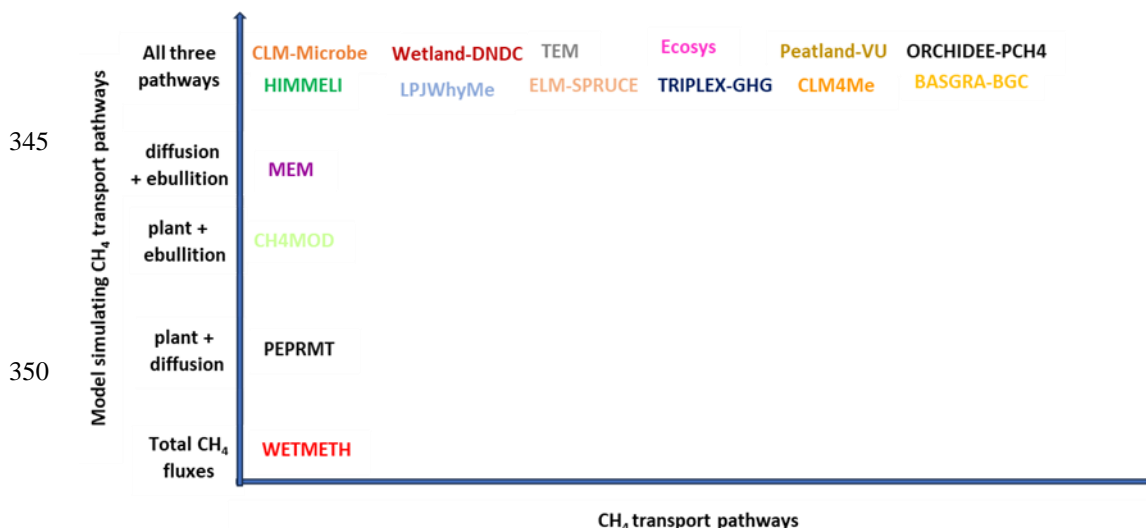

**Figure 2.** Reviewed peatland or wetlands models simulating CH<sub>4</sub> transport pathways. Each model has its own unique colour for easy identification. The + sign means model simulates both mentioned CH<sub>4</sub> transport pathways.

### 3.6 Model process-representations: Full (rank 4) and adequate (rank 3)

The 16 reviewed models were distinguished into five categories to qualitatively rank: CH<sub>4</sub> production, CH<sub>4</sub> oxidation and CH<sub>4</sub> transport processes. The ranking was done using qualitative categories 0 to 4 (as explained in section 2.2). The following sections provides information on models categorized under rank 4 (full) and rank 3 (adequate) based on their model process-representations for production, oxidation and transport processes, whereas categorization of all 16 reviewed models into the five categories is presented in Figures 3 and 4.

#### 3.6.1 Production and oxidation models

Models like CLM-Microbe, Ecosys and ELM-Spruce (Fig. 3) exhibited full CH<sub>4</sub> production and oxidation processes, since they comprehensively simulate microbial mediated processes of production (hydrogenotrophic methanogenesis, acetoclastic methanogenesis and H<sub>2</sub> production) and oxidation (aerobic methanotrophy and anaerobic methanotrophy) (Grant and Roulet, 2002; Xu et al., 2015; Riccuito et al., 2021). Meanwhile models like Peatland-VU, Wetland-DNDC, TRIPLEX-GHG, TEM, CLM4Me exhibited adequate production and oxidation processes (Fig. 3). For example, in Peatland-VU, CH<sub>4</sub> production depends on C concentration in fresh soil organic matter reservoirs (root exudates, litter, manure, dead roots, microbes and humus), reference temperature, peat temperature and rate constant R<sub>o</sub> (site-tuning parameter depending upon organic matter quality and environmental factors), while the CH<sub>4</sub> oxidation is temperature sensitive and simulated using Michaelis-Menten constants i.e., K<sub>m</sub> (half saturation) and V<sub>max</sub> (max reaction rate) (van Huissteden et al., 2006; 2009). In Wetland-DNDC, CH<sub>4</sub> production is simulated as a function of C substrates (electron donors: H<sub>2</sub> and DOC and electron acceptors: NO<sub>3</sub><sup>-</sup>, Mn<sup>4+</sup>, Fe<sup>3+</sup>, SO<sub>4</sub><sup>2-</sup> and CO<sub>2</sub>) resulting from soil organic matter decomposition and root exudates, available CH<sub>4</sub> concentrations in each layer and pH, soil temperature and redox scalars (Zhang et al., 2002; Deng et al., 2015; Gilhespy et al., 2014), while the CH<sub>4</sub> production and oxidation can simultaneously occur within a given peat volume having anaerobic



380 and aerobic portions based on soil redox (Zhang et al., 2002; Deng et al., 2015). Overall, 50% of the models exhibited full  
and adequate CH<sub>4</sub> production and CH<sub>4</sub> oxidation process representation, while the remaining 50% exhibited intermediate to  
no process representation (Fig. 3).

### 3.6.2 Plant mediated transport models

385 Models like Ecosys, HIMMELI, ORCHIDEE-PCH4, TEM, LPJWhyMe, CLM4Me, Peatland-VU exhibited full to  
adequate process representation (Fig. 4). For example, in Ecosys, plant-mediated CH<sub>4</sub> transport is simulated using air-water  
interfacial area in root, 1/2 distance between adjacent roots, root length, total cross-sectional area of root axes, detailed  
mathematical equations in Grant and Roulet (2002). Meanwhile the plant-mediated transport in HIMMELI is simulated  
using specific leaf area (SLA), leaf area index (LAI), root tortuosity and porosity (Raivonen et al., 2017) while the plant-  
mediated transport in Peatland-VU is simulated using root factor, vegetation specific CH<sub>4</sub> factor, vegetation growth rate  
proportional to primary production and fraction of CH<sub>4</sub> oxidized during plant transport (van Huissteden et al., 2006; 2009).  
390 Finally, in ORCHIDEE-PCH4, plant-mediated transport is simulated using vegetation rate constant, efficiency of plants in  
transporting CH<sub>4</sub>, root fraction, vertical root distribution, LAI, CH<sub>4</sub> concentrations in soil and atmosphere and CH<sub>4</sub> oxidized  
during plant transport, detailed equations in Salmon et al. (2022). Overall, 44% of the models exhibited full and adequate  
CH<sub>4</sub> plant-mediated process representation, while the remaining 56% of models exhibited intermediate to no process  
representation (Fig. 4).

### 3.6.3 Diffusion models

395 Models like Ecosys, TRIPLEX-GHG, CLM4Me, HIMMELI, ORCHIDEE-PCH4, TEM, LPJWHYMe, exhibited full to  
adequate process representation (Fig. 4). For example, in Ecosys, diffusion is simulated using atmospheric CH<sub>4</sub>  
concentrations, constants for CH<sub>4</sub> oxidation, air filled porosity and diffusivity, extensive equation details, refer Grant and  
Roulet (2002). Meanwhile, in TRIPLEX-GHG, diffusion is simulated using CH<sub>4</sub> molecular diffusion coefficients in air and  
400 water, peat porosity, water filled pore spaces, peat tortuosity coefficient and relative volume of coarse pores based on soil  
texture (Zhu et al., 2014), while diffusion in CLM4Me is simulated using air-filled and water-filled porosities, aqueous and  
gaseous diffusion coefficients of CH<sub>4</sub> and O<sub>2</sub>, peat temperature and water retention curve (Riley et al., 2011). Like plant-  
mediated transport, 44% of models exhibited full and adequate CH<sub>4</sub> diffusion process representation, while the remaining  
56% models exhibited intermediate to no process representation (Fig. 4).

### 3.6.4 Ebullition models

405 Ecosys, HIMMELI, ORCHIDEE-PCH4 and TEM (Fig. 4) exhibited full to adequate process representation. For example,  
Ecosys simulates ebullition using temperature growth function related to fermentation & methanogenesis processes, Ostwald  
gas solubility coefficient 30°C, atmospheric pressure, soil temperature and gas constant, details refer Grant and Roulet  
(2002). Meanwhile in HIMMELI, (Raivonen et al., 2017) and TEM (Tang et al., 2010), concentrations of CH<sub>4</sub>, CO<sub>2</sub>, O<sub>2</sub> and  
410 N<sub>2</sub> and sum of their partial pressures are utilized to simulate the occurrence of ebullition. However, it is assumed that N<sub>2</sub> is  
always in equilibrium with its atmospheric concentration of 78% and solubilities of CH<sub>4</sub>, CO<sub>2</sub>, O<sub>2</sub> in water are computed  
using Henry's law coefficient, so essentially, if sum of the partial pressures of the dissolved CH<sub>4</sub>, CO<sub>2</sub>, O<sub>2</sub> and N<sub>2</sub> exceed the  
sum of atmospheric and hydrostatic pressure, ebullition occurs in HIMMELI (Raivonen et al., 2017). Tang et al. (2010)  
modified the TEM into a multi-substance model (CH<sub>4</sub>, O<sub>2</sub>, CO<sub>2</sub> and N<sub>2</sub>) to simulate CH<sub>4</sub> production, oxidation, and transport  
415 using pressure-based ebullition algorithm, details, refer, Tang et al. (2010). Overall, only 25% of the models exhibited full  
and adequate process representation, providing an ample scope to improve diffusion processes in 75% models exhibiting  
intermediate to no process representation (Fig. 4).

420



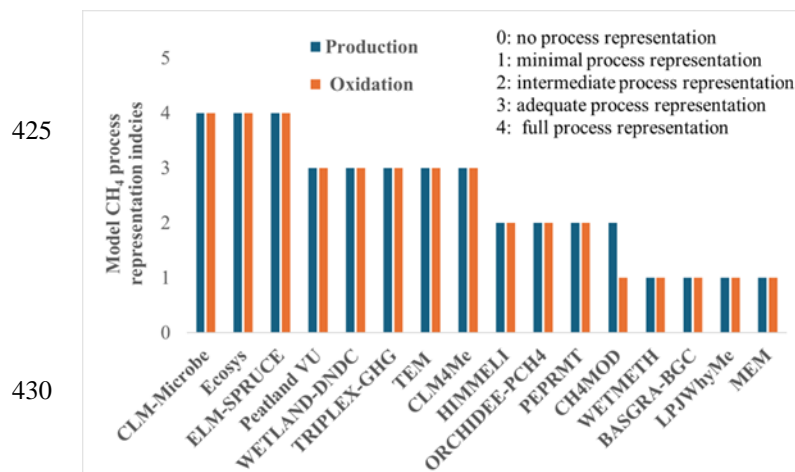

**Figure 3.** CH<sub>4</sub> process representation indices of production and oxidation. Note: the definition of the process representation indices is described in detail in section 2.2.

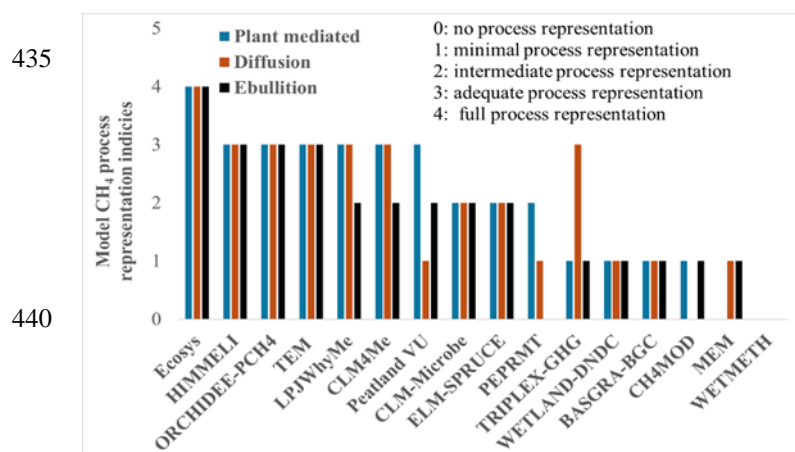

**Figure 4.** CH<sub>4</sub> process representation indices of plant-mediated transport, diffusion and ebullition. Note: the definition of the process representation indices is described in detail in section 2.2.

### 3.7 Advantages of reviewed models

All models were manually screened to identify the advantages of each model with respect to simulated CH<sub>4</sub> processes, robustness (tested in varied environments), global field testing, minimal inputs and simulation of specialized CH<sub>4</sub> transport processes (Table 5). For example, CLM-Microbe (Xu et al., 2015; Wang et al., 2019) comprehensively simulates CH<sub>4</sub> microbial processes, while BASGRA-BGC specifically simulates dual porosity nature of peat soils (Huang et al., 2021). The Ecosys (Grant and Roulet, 2002; Grant et al., 2015; 2017) comprehensively simulates WTDs, CH<sub>4</sub> production, CH<sub>4</sub> oxidation and three CH<sub>4</sub> transport pathways, while ELM-Spruce (Xu et al., 2015; He et al., 2020; Yuan et al., 2021; Wang et al., 2019) comprehensively simulates all CH<sub>4</sub> processes occurring in the forested peatlands. The PEPRMT (Oikawa et al., 2017) incorporates the lag effect of lowering water table on CH<sub>4</sub> production and quantifies CH<sub>4</sub> fluxes from restored wetlands and rice fields. With regards to robustness and global field testing, HIMMELI (Raivonen et al., 2017) has the ability to simulate varied peat environments, while Peatland-VU (van Huissteden et al., 2006; 2009; Budishchev et al., 2014; Mi et al., 2014), Wetland-DNDC (Li et al., 1992a, b; Li, 2000 ; Zhang et al., 2002; Gilhespy et al., 2014; Deng et al., 2015) and TRIPLEX-GHG (Zhu et al., 2014; Zhu et al., 2016; Zhu et al., 2017) were tested against field data from arctic, temperate, tundra and boreal peatlands and wetlands. BASGRA-BGC has been tested using field data from Finland, Sweden and Norway, but there is ample scope for further model testing from temperate and tropical sites (Huang et al., 2021).



LPJWhyMe (Wania et al., 2010) simulates CH<sub>4</sub> fluxes across regional, national, and global scales, while CH<sub>4</sub>MOD (Li et al., 2010; 2016; 2017) can be utilized to simulate CH<sub>4</sub> fluxes from wetlands, marshlands, peatlands and fens. ELM-Spruce (Xu et al., 2015; He et al., 2020; Yuan et al., 2021; Wang et al., 2019) is widely tested against field measured data from forested Minnesota peatlands, tropical and Amazonian peatlands, while Ecosys (Grant and Roulet, 2002; Grant et al., 2015; 2017) is widely tested across the globe (100 or more publications). With regards to model inputs, WETMETH (Nzotungicimpaye et al., 2021), MEM (Lai, 2009) and PEPRMT (Oikawa et al., 2017) are less input intensive, but the modelled CH<sub>4</sub> fluxes simulated the measured CH<sub>4</sub> fluxes from different peatland and wetland sites located in pan-arctic, tropical, temperate and boreal regions (Lai, 2009; Oikawa et al., 2017; Fertitta-Roberts et al., 2019; Nzotungicimpaye et al., 2021). Finally, with respect to simulating specialized CH<sub>4</sub> transport processes, TEM incorporates a 4-substance (CO<sub>2</sub>, CH<sub>4</sub>, O<sub>2</sub> and N<sub>2</sub>) pressure-based algorithm, which resulted in modelled CH<sub>4</sub> fluxes accurately simulating measured CH<sub>4</sub> fluxes (two Michigan peatlands) via ebullition (Tang et al., 2010).

### 3.8 Limitations of reviewed models

Similar to model advantages, the limitations of each model were differentiated with respect to processes not simulated, highly input intensive, larger computational resources, not simulating different peatland types and CH<sub>4</sub> transport pathways (Table 6). For example, HIMMELI (Raivonen et al., 2017) and BASGRA-BGC (Huang et al., 2021) do not simulate snow dynamics, while the HIMMELI does not simulate any electron acceptors, except O<sub>2</sub>. Peatland-VU (van Huissteden et al., 2006; 2009; Budishchev et al., 2014; Mi et al., 2014) does not simulate particulate and dissolved organic carbon and peat subsidence, while Peatland-VU and ELM-Spruce (Xu et al., 2015; He et al., 2020; Yuan et al., 2021; Wang et al., 2019) do not simulate peat growth and changes in peatland microtopography. TRIPLEX-GHG (Zhu et al., 2014; Zhu et al., 2016; Zhu et al., 2017) does not incorporate different plant functional types (PFTs) and does not simulate dynamic O<sub>2</sub> concentration changes. WETMETH (Nzotungicimpaye et al., 2021) lacks detailed process representation of CH<sub>4</sub> production and oxidation and does not simulate CH<sub>4</sub> storage underneath frozen soil and its release upon snow melt. ORCHIDEE versions (Peatland surface, MICT, Peat-4596, PCH4) (Largeron et al., 2018; Qiu et al., 2018; Giumberteau et al., 2019) simulate vertical peat growth, but lateral peat development is lacking in grid-based simulations. For ORCHIDEE to simulate tropical peatlands, improvements in representation of tropical vegetation are required, for example, oxidation of deeper peat due to tropical tree pneumatophores (breather roots) (Qiu et al., 2019). ORCHIDEE versions also require improved representation of Holocene climate, distinguishing bogs vs. fens to parameterize water inflows and incorporating dissolved organic carbon (DOC) leaching to improve C budget and CH<sub>4</sub> emissions (Salmon et al., 2022). PEPRMT (Oikawa et al., 2017) ignores CH<sub>4</sub> production and CH<sub>4</sub> oxidation in multiple peat layers, while no carbon pools can be simulated at millennial to centennial time scales. TEM (Zhuang et al., 2004) does not simulate CH<sub>4</sub> release during the non-growing season in frozen climates and does not simulate CH<sub>4</sub> fluxes from coastal wetlands. MEM (Lai, 2009) does not simulate any vegetation types, while improvements are required in processes related to peat mineralization and water table simulations. CLM4Me (Lawrence et al., 2011; Oleson et al., 2010; Riley et al., 2011) requires improvements in simulating surface and subsurface hydrology, pH and redox, while daily WTDs are not simulated in CH<sub>4</sub>MOD (Li et al., 2010; 2016; 2017).

495

500

**Table 5.** Advantages of reviewed peatland or wetland models.

|  processes                |  Good model robustness and global field testing                                                                                            |  Minimal inputs                                                     |  Specialized CH <sub>4</sub> transport process |
|--------------------------------------------------------------------------------------------------------------|-------------------------------------------------------------------------------------------------------------------------------------------------------------------------------------------------------------------------------|--------------------------------------------------------------------------------------------------------------------------------------------------------|---------------------------------------------------------------------------------------------------------------------------------|
| <p><b>CLM-Microbe, BASGRA-BGC, Ecosys, ELM-SPRUCE and PEPRMT:</b> simulate key CH<sub>4</sub> processes.</p> | <p><b>HIMMELL, Peatland-VU, Wetland-DNDC, TRIPLEX-GHG, BASGRA-BGC, LPJWilyMe, CH4MOD, Ecosys and ELM-SPRUCE:</b> field tested in varied environments in different biomes (arctic, tundra, boreal, temperate and tropical)</p> | <p><b>WETMETH, Methane Emission Model (MEM) and PEPRMT:</b> minimal inputs yet simulated fluxes followed the trends of measured fluxes adequately.</p> | <p><b>TEM:</b> accurately mimicking measured CH<sub>4</sub> fluxes via ebullition</p>                                           |

**Table 6.** Limitations of reviewed peatland or wetland models.

|  Model limitations due to unrepresented processes                                                                                                                                                                                                                                                                                                                                                                                                                                                                                                                                                                                                                                                           |  Highly input intensive, larger computational cost & associated modelled uncertainties                                                                                                                                                                                                                                                                                                                                                                                                                                                                                                                                                                                                                                                   |  Limited representation of wetland types                                                                                                                                         |
|------------------------------------------------------------------------------------------------------------------------------------------------------------------------------------------------------------------------------------------------------------------------------------------------------------------------------------------------------------------------------------------------------------------------------------------------------------------------------------------------------------------------------------------------------------------------------------------------------------------------------------------------------------------------------------------------------------------------------------------------------------------------------------------------|-----------------------------------------------------------------------------------------------------------------------------------------------------------------------------------------------------------------------------------------------------------------------------------------------------------------------------------------------------------------------------------------------------------------------------------------------------------------------------------------------------------------------------------------------------------------------------------------------------------------------------------------------------------------------------------------------------------------------------------------------------------------------------------------------------------------------------|-------------------------------------------------------------------------------------------------------------------------------------------------------------------------------------------------------------------------------------------------------------------|
| <p><b>HIMMELL, Peatland-VU, TRIPLEX-GHG, WETMETH, ORCHIDEE-PCH4 revision 7020, BASGRA-BGC, Terrestrial Ecosystem Model (TEM), Methane Emission Model (MEM), CH4MOD, PEPRMT, ELM-SPRUCE and CLM4Me:</b> model processes related to snowpack, electron acceptors, dissolved organic carbon, peat subsidence, peat growth, changes in peatland microtopography, incorporating more multiple plant functional types (PFTs), improving ebullition algorithm, improving process representation of CH<sub>4</sub> production and CH<sub>4</sub> oxidation, incorporating tropical peat vegetation, distinguishing peatlands vs. fens to better parameterize water inflows, improvements in simulating surface and subsurface hydrology, pH and redox, simulation of daily water table depths etc.</p> | <p><b>CLM-Microbe:</b> highly microbial input intensive, site-specific microbial inputs not always available impacting modelled CO<sub>2</sub> and CH<sub>4</sub> fluxes.<br/> <b>TRIPLEX-GHG:</b> high computational resources.<br/> <b>ELM-SPRUCE:</b> extensive microbial inputs &amp; high computational resources.<br/> <b>Peatland-VU:</b> field measured soil carbon reservoir (peat, roots, litter) data not available at all sites leading to higher uncertainties in model outputs.<br/> <b>BASGRA-BGC:</b> lack of drainage data, carbon (C), nitrogen (N) contents impact model results.<br/> <b>Ecosys:</b> lack of continuous spatial and temporal field data constrains calibration and validation.<br/> <b>Terrestrial Ecosystem Model (TEM):</b> not every peatland site has measured ebullition data.</p> | <p><b>WETMETH:</b> does not distinguish and simulate different wetland types.<br/> <b>ORCHIDEE-PCH4:</b> does not distinguish ombrotrophic vs. minerotrophic peatlands.<br/> <b>CLM4Me:</b> grid cell approach does not capture differences in wetland types.</p> |



505 **3.9 Model inputs most impactful on simulating CH<sub>4</sub> fluxes**

Published literature pertinent to individual models were manually screened, and it was identified that 5 out of 16 models tested their model-sensitivities on inputs for predicting total CH<sub>4</sub> fluxes, rather than individual CH<sub>4</sub> transport pathways (Fig. 5). Of the remaining 11 models, three models did not publish their sensitivity analysis, while eight models tested their sensitivities to model inputs for simulating individual CH<sub>4</sub> transport pathways (Fig. 7). Based on the reviewed published model-sensitivities, the model-inputs were categorized for each model into those that have a critical impact on the total CH<sub>4</sub> fluxes (Fig. 6) and individual CH<sub>4</sub> transport pathway predictions (Fig. 7).

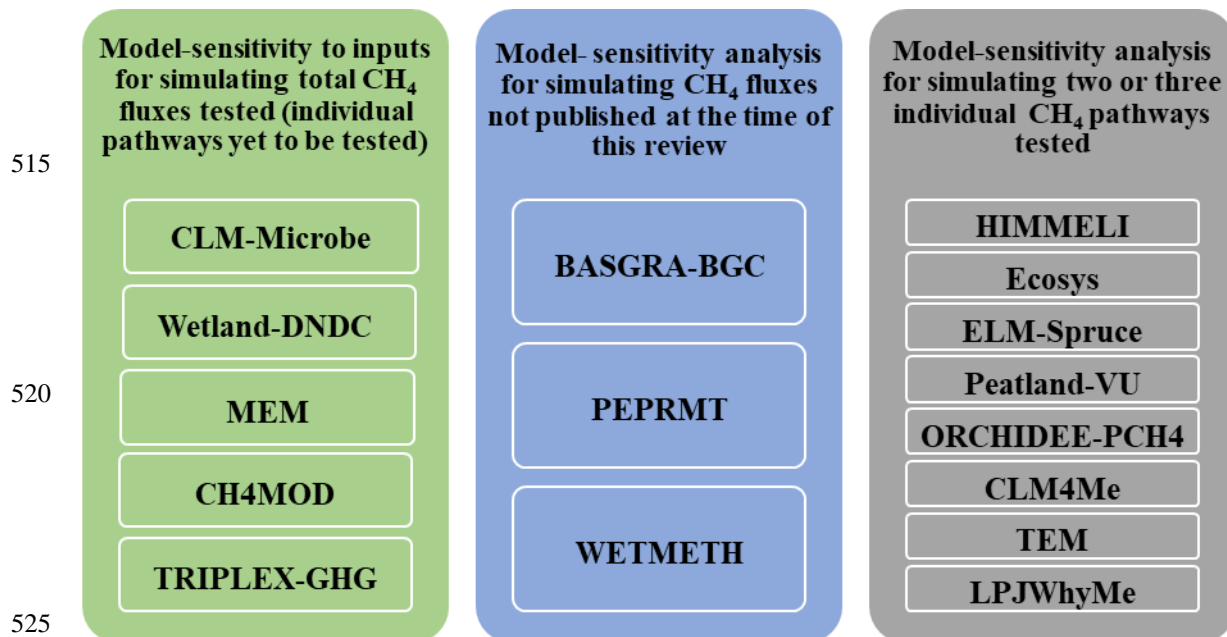

**Figure 5.** Reviewed peatland or wetland models distinguished into three categories shown above. Note: this figure reflects the information relevant to this review only and at the time when this review was conducted.

530

535

540



545

550

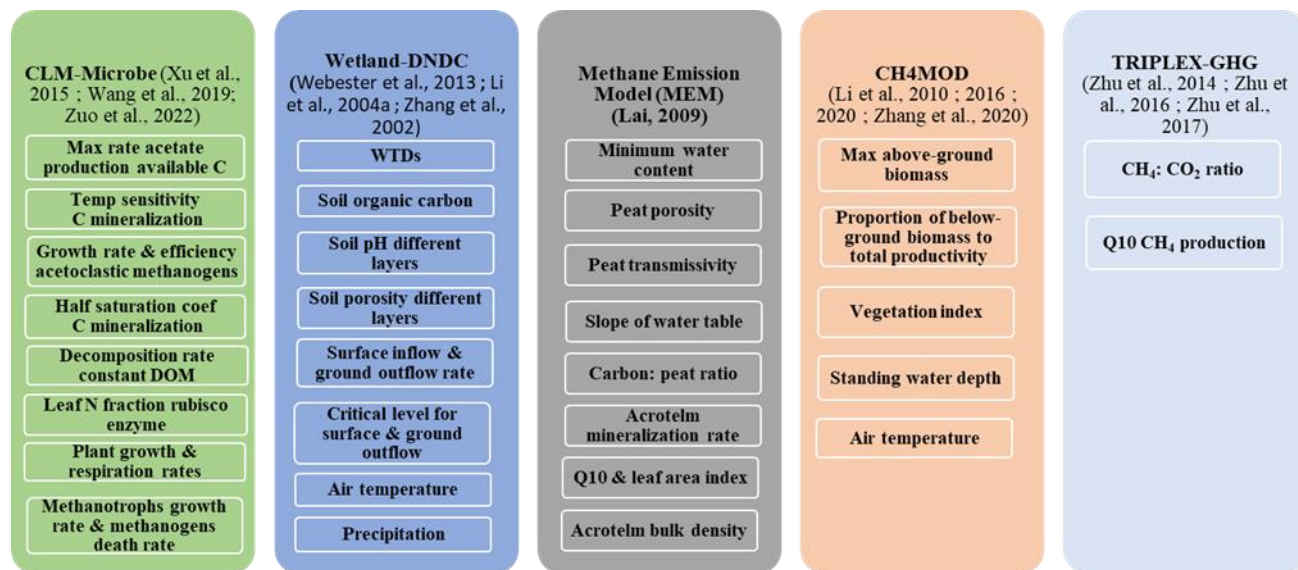

**Figure 6.** Critical inputs in each model impacting total CH<sub>4</sub> flux predictions.

555

560

565

570



575

580

585

590

595

600

605

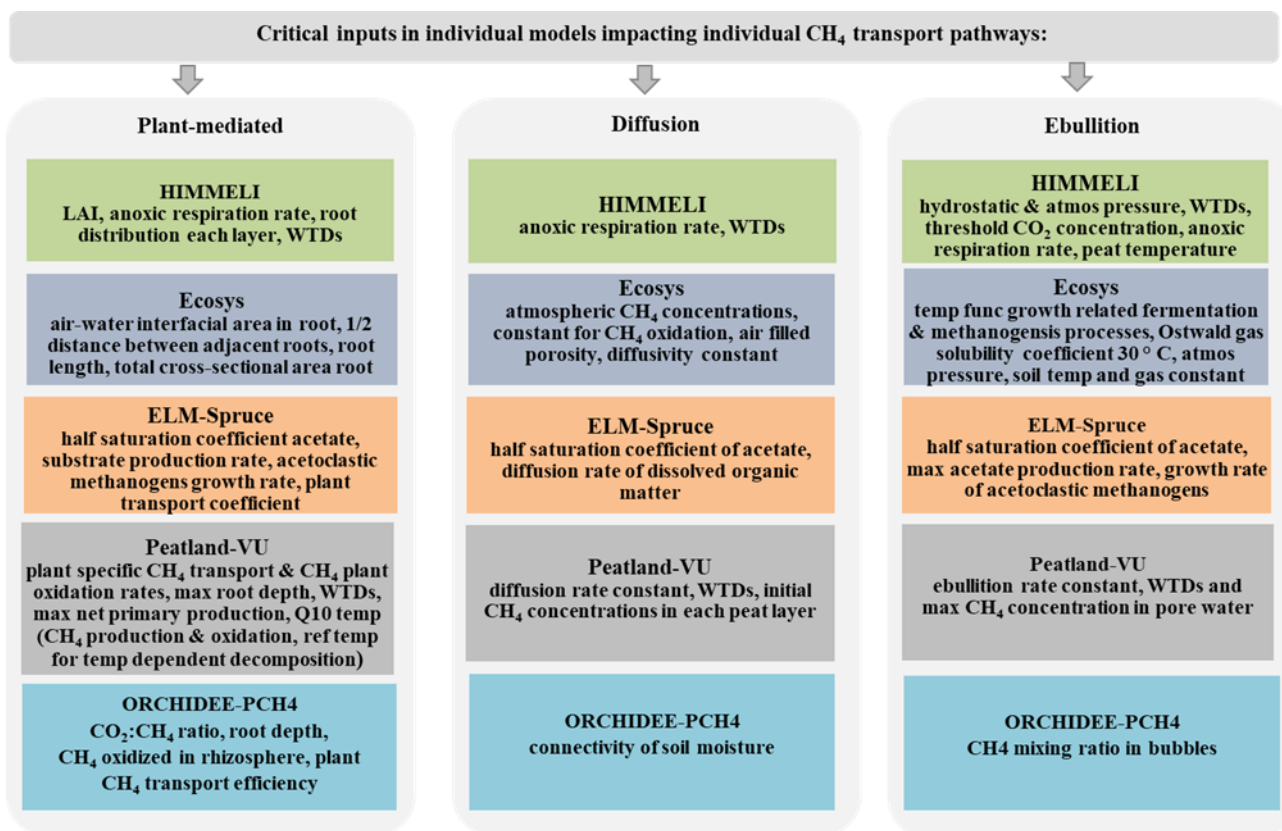

**Figure 7.** Critical inputs in each model impacting individual CH<sub>4</sub> transport pathway of plant-mediated transport, diffusion and ebullition.



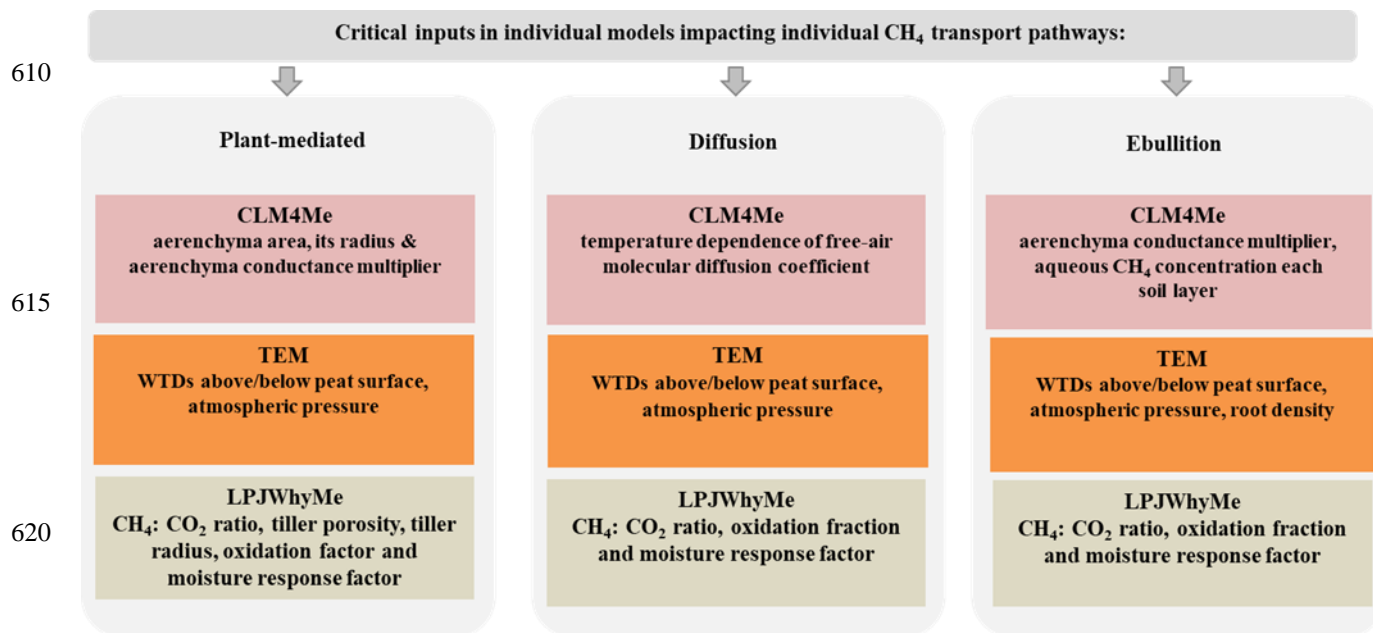

Figure 7. continued.

625

630

635



## 4 Discussion

### 4.1 Model parameterization for fine-tuning measured and simulated CH<sub>4</sub> fluxes

The common driving variables required to parameterize any peatland or wetland models are climate, hydrology, physical and chemical properties, vegetation (Table 3) and measured CO<sub>2</sub> and CH<sub>4</sub> fluxes (Schrier-Uijl et al., 2010; Oertel et al., 2012). These variables vary spatially and temporally within a site and different sites, thus strongly impacting CH<sub>4</sub> production, oxidation and transport (Zuo et al., 2022; He et al., 2024). Therefore, models are parameterized against measured fluxes and driving variables available for limited spatial and temporal periods. But different models operate at different spatial and temporal scales (Table 2), exhibit different time frames for stabilization of different carbon pools (Fig. 1) and exhibit varying degrees of process representations (Figs. 3 and 4). Model parameterization in this review does not refer to the parameterization performed in the source-code, but it refers to the fine tuning of the model inputs (Table 4) to minimize the error between the simulated and measured CH<sub>4</sub> flux data. So, parametrization will depend upon how adequately each model simulates CH<sub>4</sub> production, CH<sub>4</sub> oxidation and CH<sub>4</sub> transport processes. For example, CLM-Microbe, Ecosys and ELM-Spruce exhibit full CH<sub>4</sub> production and oxidation process representation (Fig. 3) since they have larger microbial inputs such as growth and death rates of methanogens and methanotrophs etc., where such site-specific microbial data is rarely available, but is fine-tuned to have good agreement between simulated and measured fluxes (Xu et al., 2015; Wang et al., 2019; Ricciuto et al., 2021). However, Zuo et al. (2024) parameterized CLM-Microbe using site-specific genomic data which improved the model's ability to accurately reproduce measured CH<sub>4</sub> fluxes. But such site-specific genomic data is not available at all sites, so simulated changes in methanogen biomass cannot be verified against measured data (Zuo et al., 2022). Models like Peatland-VU, Wetland-DNDC, BASGRA-BGC, HIMMELI, MEM, PEPRMT, CH4MOD have lesser microbial inputs compared to CLM-Microbe, Ecosys and ELM-Spruce. However, the key parametrization inputs in less microbially intensive models are aerobic and anaerobic decomposition rates of different pools (peat, humus, roots, litter, exudates, fast, slow), vegetation (leaf area index, primary production), and CH<sub>4</sub> parameters (Michaelis-Menton oxidation, diffusion, ebullition and plant transport rate constants) (Table 4). However, the decomposition rates of different pools are rarely available from site-specific studies, but they are rather fine-tuned to reduce the error between simulated and measured fluxes, as in Peatland-VU (Mi et al., 2014) and Wetland-DNDC (Deng et al., 2015; Taft et al., 2019). Models like TRIPLEX-GHG, CLM4Me, ORCHIDEE-PCH4, LPJWhyMe, TEM and WETMETH simulate fluxes at regional, national and global scale consisting of grid scale resolutions varying from 0.25-0.5° respectively. These key inputs are spatial distributions of soil texture, pH, carbon contents, topographical features, wetland distributions and satellite derived inundation and non-inundation data (Table 4). But these models are linked to earth system models, for example, ORCHIDEE-PCH4 is embedded in ORCHIDEE-PEAT revision 4596 (Qiu et al., 2018) and ORCHIDEE land surface model (Krinner et al., 2005) having their own inputs. However, generally regional, national and global scale models require larger time frames for carbon pool stabilizations (Fig. 1), exhibit larger flux uncertainties due to lack of detailed CH<sub>4</sub> production and oxidation processes (Nzotungicimpaye et al., 2021), do not distinguish bogs, fens, or marshes and lack incorporation of dissolved organic carbon (DOC) leaching to improve C budget and CH<sub>4</sub> fluxes (Salmon et al., 2022).

### 4.2 Model performance of goodness of fit between measured and simulated CH<sub>4</sub> fluxes

All reviewed models evaluated the goodness of fit between simulated and measured data using R-squared (R<sup>2</sup>, Coefficient of Determination (CD)). However, a few models: BASGRA-BGC, and PEPRMT utilized normalized root mean square error and Nash Sutcliffe efficiency (NSE) (Nash and Sutcliffe, 1970) to compare simulated vs measured. Field testing of CLM-Microbe (Arctic tundra, freshwater marsh, mountain peatland and undisturbed Alaska fen), Ecosys (upland tundra, lowland fen, poorly drained fen) and ELM-Spruce (ombrotrophic peatland) found simulated fluxes in agreement with measured CH<sub>4</sub> fluxes having an R<sup>2</sup> 0.41-0.91 (Grant and Roulet, 2002; Grant et al., 2015; Ricciuto et al., 2021; Yuan et al., 2021; Wang et al., 2019; Zuo et al., 2022). But discrepancies between simulated and measured CH<sub>4</sub> fluxes were observed, for example in CLM-Microbe, simulated CH<sub>4</sub> fluxes peaked earlier than measured CH<sub>4</sub> fluxes (Xu et al., 2015), while simulated CH<sub>4</sub> fluxes were under-estimated at daily and hourly scale by 20 and 25% compared to measured CH<sub>4</sub> fluxes (Wang et al., 2019). Meanwhile, Peatland-VU was field tested at eutrophic and oligotrophic Dutch sites, Stordalen mire (discontinuous permafrost) and Northeast Siberia (continuous permafrost) (van Huissteden et al., 2009; Petrescu et al., 2008; Mi et al., 2014) and Wetland-DNDC at North American wetlands, boreal fens Ontario, Canada, Alaska, fen and intensively cultivated horticultural UK peat soils (Zhang et al., 2002; Webster et al., 2013; Deng et al., 2015; Taft et al., 2019). Peatland-VU simulated CH<sub>4</sub> fluxes agreed with measured CH<sub>4</sub> fluxes at seasonal and annual scale, but exhibited low R<sup>2</sup>, since measured



685 peaks were not captured by simulated peaks, this under-estimation was some-what improved by incorporating net primary  
production (vegetation) and CH<sub>4</sub> oxidation parameters (van Huissteden et al., 2009). The R<sup>2</sup> in case of Wetland-DNDC  
varied from 0.37-0.66 (North American Wetlands), 0.37-0.85 (Alaska fen) and exhibited low R<sup>2</sup> in UK horticultural peat  
690 soils due to simulated moisture not in agreement with measured moisture. Field testing of BASGRA-BGC (Huang et al.,  
2021) in Finland, Denmark and Norway, MEM in Mer Bleue Bog, Canada (Lai, 2009), CH<sub>4</sub>MOD in marsh and mountain  
peatlands, China (Li et al., 2010), PEPRMT in restored wetlands and rice paddies in Sacramento-San Joaquin River Delta,  
California (Oikawa et al., 2017) and HIMMELI in two Finland peat sites (Raivonen et al., 2017) revealed good agreement  
between simulated and measured CH<sub>4</sub> fluxes having R<sup>2</sup>: 0.25-0.80 (BASGRA-BGC), 0.31-0.82 (CH<sub>4</sub>MOD), 0.46-0.81  
695 (PEPRMT), 0.63-0.70 (HIMMELI). While the field testing of TRIPLEX-GHG (Zhu et al., 2014), WETMETH  
(Nzotungicimpaye et al., 2021), LPJWhyMe (Wania et al., 2010), ORCHIDEE-PCH<sub>4</sub> (Salmon et al., 2022), CLM4Me  
(Riley et al., 2011) and TEM (Zhuang et al., 2004) across wetlands, fens, marshes and peatlands located in Temperate,  
Tropical, Boreal, Pan-arctic, Arctic, Sub-arctic, Tundra and Boreal forest generally revealed good agreement between  
measured and simulated CH<sub>4</sub> fluxes having R<sup>2</sup> 0.1-0.7 (TRIPLEX-GHG), simulated CH<sub>4</sub> fluxes (4.1 Tg yr<sup>-1</sup>) in agreement  
with measured CH<sub>4</sub> fluxes (3.9 ± 1.3 Tg yr<sup>-1</sup>) for West Siberian lowlands (WETMETH), normalized root mean square error  
(NRMSE 0.40-1.15) for LPJWhyMe at all peatland and wetland sites respectively 

#### 700 4.3 Model sensitivity analysis

Models like BASGRA-BGC, PEPRMT and WETMETH have ample scope for conducting sensitivity analysis to identify  
critical inputs impacting CH<sub>4</sub> production, oxidation and transport. Meanwhile, CLM-Microbe, Wetland-DNDC, MEM,  
CH<sub>4</sub>MOD and TRIPLEX-GHG have not yet identified critical inputs sensitive to individual CH<sub>4</sub> pathways (Fig. 6).  
However, HIMMELI, Ecosys, ELM-Spruce, Peatland-VU, ORCHIDEE-PCH<sub>4</sub>, CLM4Me, TEM and LPJWhyMe identified  
705 critical inputs for individual CH<sub>4</sub> transport pathways (Fig. 7). However, all these models conducted local sensitivity analysis  
to identify the critical inputs, except Peatland-VU which conducted global sensitivity analysis (GLUE methodology) (van  
Huissteden et al., 2009).  The effort should be directed to conduct global sensitivity analysis rather than local sensitivity  
analysis. For future model users, critical plant mediated inputs, common to all models, are root distribution in each layer,  
WTDs, LAI, max root depth, plant transport coefficient, CH<sub>4</sub> oxidized in rhizosphere, plant-specific CH<sub>4</sub> transport factor,  
710 plant growth and respiration and Q10 production and Q10 oxidation. Common critical diffusion inputs are WTDs, air-filled  
porosity, soil porosity, CH<sub>4</sub> diffusion rate constant, CH<sub>4</sub> atmospheric concentration, CH<sub>4</sub> concentration in each soil layer, soil  
moisture connectivity and CH<sub>4</sub>:CO<sub>2</sub>, while common critical ebullition inputs are CH<sub>4</sub> concentrations in each soil layer,  
pore-water and threshold CH<sub>4</sub> concentrations, WTDs, CH<sub>4</sub>:CO<sub>2</sub>, CH<sub>4</sub> ebullition rate constant, soil temperature and CH<sub>4</sub>  
atmospheric concentration.

#### 715 4.4 Modelling challenges

All reviewed models revealed common difficulties affecting their parametrizations due to non-availability of continuous  
flux and in-situ environmental data (Ueyama et al., 2022). So, models are often parametrized using discontinuous flux and  
in-situ environmental data. For example, Peatland-VU, Wetland-DNDC, BASGRA-BGC and CLM4Me were generally  
parametrized using discontinuous CH<sub>4</sub> flux and spatially and temporally limited environmental in-situ data, resulting in  
720 simulated CH<sub>4</sub> peaks not adequately capturing the measured CH<sub>4</sub> peaks, while in case of CLM-Microbe, there were time-lag  
differences between simulated and measured CH<sub>4</sub> fluxes (Xu et al., 2015; Wang et al., 2019). Another challenge is the  
process complexity of CH<sub>4</sub> dynamics, since production and oxidation are characterized by complex interactions between  
microbial communities, hydrology, soil physical and chemical properties and vegetation (Zuo et al., 2024). However, many  
models simplify these interactions, by utilizing generic parameter values such as scaling parameters of CH<sub>4</sub> production and  
725 CH<sub>4</sub> oxidation as in WETMETH (Nzotungicimpaye et al., 2021) and exclusion of critical processes in PEPRMT such as no  
CH<sub>4</sub> production and CH<sub>4</sub> oxidation in multiple peat layers and no carbon pool simulations at millennial to centennial time  
scales (Oikawa et al., 2017). However, CLM-Microbe, Ecosys, and ELM-Spruce, incorporate detail CH<sub>4</sub> production and  
CH<sub>4</sub> oxidation processes governed by growth and death rates of methanogens and methanotrophs, typically derived from  
lab incubation studies (Xu et al., 2015; Wang et al., 2019). Similar incubation studies are not widely available across  
730 different peatland or wetland sites and across different ecoregions (tundra, arctic, tropical, boreal and temperate) limiting  
the applicability of these microbially-based models. Moreover, models struggle to capture the CH<sub>4</sub> fluxes during extreme  
weather events which is crucial for accurately predicting future CH<sub>4</sub> dynamics, where shifts in precipitation patterns and  
temperature could significantly alter CH<sub>4</sub> fluxes (Abdalla et al., 2016). Therefore, to adequately capture extreme weather

735 events, continuous weather, CH<sub>4</sub> fluxes and in-situ environmental data should be available for at-least 5 years, for models to have independent calibration and validation datasets, so that the future CH<sub>4</sub> fluxes can be accurately predicted under future climatic conditions (Xu et al., 2016).

#### 4.5 Suggestions and recommendations on future research directions

740 a) **Need for continuous long-term field data:** For more accurate model-input parameterizations, it is recommended to have available continuous site-specific data on precipitation, evaporation, radiation, air temperatures and in-situ environmental data (e.g. WTDs, peat temperature, peat moisture and leaf area index). A combination of manual chamber, EC tower, and automated chamber data be at-least available for 5 years, so that high quality spatial and temporal CH<sub>4</sub> fluxes are available for model parametrization, to accurately predict CH<sub>4</sub> fluxes under future climatic conditions including extreme events. **To improve CH<sub>4</sub> predictions from different earth system models (ESMs) continuous flux and environmental in-situ data are required from data scarce regions namely Congo, Amazon and Southeast Asia rainforests, rice crop areas in India and Bangladesh, Savanah, Africa, Central and South America (McNicol et al., 2023; Zhao et al., 2024).**

745 b) **Online data repository:** There is a need to create an on-line repository containing genomic data related to methanotrophs, methanogens, bacteria and fungi from peatlands, marshes and fens of different nutrient gradients (rich, intermediate and poor) from different ecosystems such as arctic, subarctic, tundra, tropical, boreal and temperate to better parameterize microbial models like CLM-Microbe, Ecosys and ELM-Spruce.

750 c) **Development of new models:** Future modelling efforts should prioritize the mechanistic understanding of the microbial processes, possibly through the development of multi-species models that simultaneously simulate the interactions between different microbial communities and their influence on CH<sub>4</sub> fluxes. There is also a pressing need for an integrated model that considers the interplay between **CH<sub>4</sub> dynamics and C and N cycling.**

755 d) **Artificial intelligence (AI), Hybrid modelling and Machine learning:** Utilize continuous in-situ flux and environmental data into different AI models which are computationally less intensive and faster than traditional models (US DOE, 2024). More studies across the globe need to utilize the multi-model ensemble (MME) approach combining different machine learning models (decision tree (DT), random forest (RF), extreme gradient boosting (XGB), artificial neural network (ANN), Gated Recurrent Units (GRU) and Long Short-Term Memory (LSTM) using CH<sub>4</sub> chamber, EC tower, in-situ environmental data and current and future climate data to estimate current and future global peatland and wetland CH<sub>4</sub> emissions (Chen et al., 2024; Chinta and Zu, 2024; Xiao et al., 2024).

765 e) **Sensitivity analysis:** Models like BASGRA-BGC, PEPRMT and WETMETH have ample scope for conducting local or global sensitivity analysis to identify critical inputs impacting CH<sub>4</sub> production, oxidation and transport, while CLM-Microbe, Wetland-DNDC, MEM, CH<sub>4</sub>MOD and TRIPLEX-GHG have ample scope to identify critical inputs impacting individual CH<sub>4</sub> transport pathways. All the reviewed models need to conduct global sensitivity analysis rather than local sensitivity analysis.

f) **Remote sensing:** Utilize high-resolution remote sensing data alongside continuous data on CH<sub>4</sub> flux, peat moisture, peat temperature and **WTDs**, so that the earth system models can better capture wetland and peatland heterogeneous environments to accurately estimate CH<sub>4</sub> fluxes under different climatic and environmental conditions.

770 g) **Improvements in model process representation:** Models like HIMMELI and BASGRA-BGC may need to incorporate snow processes, while Peatland-VU may need to incorporate particulate and dissolved organic carbon processes and peat subsidence. TRIPLEX-GHG may benefit from incorporating different plant functional types, while WETMETH from detailed CH<sub>4</sub> production and CH<sub>4</sub> oxidation processes. Following improvements are suggested for ORCHIDEE-PCH4: incorporation of lateral peat growth, tropical vegetation growth processes, distinguishing between bogs and fens to parameterize water inflows and incorporate dissolved organic carbon (DOC) leaching to improve C budget and CH<sub>4</sub> fluxes. Suggested improvements for CLM4Me include improving surface and subsurface hydrology, while suggestions for CH<sub>4</sub>MOD include incorporating groundwater processes to simulate daily WTDs.



## 5 Conclusions

This study reviewed 16 peatland and wetland models that simulated different temporal and spatial scales, exhibited different spin-times for stabilization of different carbon pools, simulated two or three CH<sub>4</sub> transport pathways or total CH<sub>4</sub> fluxes and exhibited variable process representations of CH<sub>4</sub> production, CH<sub>4</sub> oxidation and CH<sub>4</sub> transport. **To further improve the parameterization of microbial mediated models (Ecosys, ELM-Spruce and CLM-Microbe), we propose the development of online-data repository i.e., international databases incorporating genomic data related to methanogens and methanotrophs from different peatland and wetland types (bogs, fens, marshes, forested peatlands) located in arctic, subarctic, tundra, tropical, boreal and temperate.** In case of the ebullition, only 25% of the models exhibited full to adequate process representation. This essentially means that 75% of the models have scope to incorporate detailed processes or mechanisms related to ebullition. But direct measurements of ebullition from peat-water matrix are challenging and rarely measured in the field. More field studies need to measure ebullition using **AI enabled platforms of edge computing** and autonomous laboratories to capture ebullition hotspots and hot moments during extreme storm events, where CH<sub>4</sub> fluxes rapidly occur within a shorter time frame. Also, along with incorporating high frequency field data, models also could improve their ebullition algorithms by incorporating different approaches (CH<sub>4</sub> pore water concentration (**ECT**), **pressure (EPT)** or **free-phase gas volume (EBG)** threshold), so that simulated CH<sub>4</sub> fluxes can capture the peaks of the measured CH<sub>4</sub> fluxes resulting in a better statistical agreement. In conclusion, we find that the existing CH<sub>4</sub> models could be adequate for site, plot and field scale CH<sub>4</sub> flux predictions, but that a mechanistic predictive understanding, particularly of CH<sub>4</sub> transport pathways, **is still lacking.**

**Code and Data availability.** The authors confirm that the data supporting the findings of this study are available within the article and its Supplement.

**Author's contributions.** Amey S. Tilak: Conceptualization, Data curation, Formal analysis, Investigation, Methodology, Validation, Visualization, Writing original draft, funding acquisition, review and editing. Ruchita Ingle: conceptualization, review and editing. Alina Premrov: Conceptualization, Formal analysis, review and editing. Nigel Roulet: Conceptualization, review and editing. Benjamin Runkle: Visualization, review and editing. Matthew Saunders: funding acquisition, review and editing. Avni Malhotra: Conceptualization, Formal analysis, Visualization, review and editing, Kenneth A. Byrne: Visualization, funding acquisition and review and editing.

**Competing interest.** The authors declare that they have no known competing financial interests or personal relationships that could have appeared to influence the work reported in this paper.

**Financial support.** Amey S. Tilak is funded and co-funded by the Irish Environmental Protection Agency (EPA) and the Department of Agriculture, Food and Marine (DAFM) under the grant number: CH<sub>4</sub> PEAT: 2021-CE-1060, while Alina Premrov is funded by the Irish Environmental Protection Agency (EPA) under the grant number: CO<sub>2</sub> PEAT: 2022 CE 1100. Avni Malhotra was supported by COMPASS-FME, a multi-institutional project supported by the U.S. Department of Energy, Office of Science, Biological and Environmental Research as part of the Environmental System Science Program. The Pacific Northwest National Laboratory is operated for DOE by Battelle Memorial Institute under contract DE-AC05-76RL01830.

## References

- Abdalla, M., Hastings, A., Truu, J., Espenberg, M., Mander, Ü., and Smith, P.: Emissions of methane from northern peatlands: a review of management impacts and implications for future management options, *Ecology and Evolution*, 6, 7080-7102, <https://doi.org/10.1002/ece3.2469>, 2016.
- Acosta, M., Dušek, J., Sonia Chamizo, S., Serrano-Ortiz, P., and Pavelka, M.: Autumnal fluxes of CH<sub>4</sub> and CO<sub>2</sub> from Mediterranean reed wetland based on eddy covariance and chamber methods, *Catena*, 183, 104191, <https://doi.org/10.1016/j.catena.2019.104191>, 2019.
- Avis, C.A., Weaver, A.J., and Meissner, K.J.: Reduction in areal extent of high-latitude wetlands in response to permafrost thaw, *Nat, Geoscience*, 4, 444-448, <https://doi.org/10.1038/ngeo1160>, 2011.





- Baldocchi, D.D., Falge, E., and Wilson, K.W.: A spectral analysis of biosphere-atmosphere trace gas flux densities and meteorological variables across hour to multi-year time scales, *Agric. For. Meteorol*, 107(1), 1-27, [https://doi.org/10.1016/S0168-1923\(00\)00228-8](https://doi.org/10.1016/S0168-1923(00)00228-8), 2001a.
- 825 Baldocchi, D.D.: Assessing the eddy covariance technique for evaluating carbon dioxide exchange rates of ecosystems: past, present and future, *Global Change Biology*, 9, 479-492, <https://doi.org/10.1046/j.1365-2486.2003.00629.x>, 2003.
- Brunke, M.A., Broxton, P., Pelletier, J., Gochis, D., Hazenberg, P., Lawrence, D.M., Leung, L.R., Niu, G.Y., Troch, P.A., and Zeng, X.: Implementing and evaluating variable soil thickness in the Community Land Model, version 4.5 (CLM4.5), *Journal of Climate*, 29(9), 3441-3461, <https://doi.org/10.1175/JCLI-D-15-0307.1>, 2016.
- 830 Budishchev, A., Mi, Y., van Huissteden, J., Beletti-Marchesini, L., Schaepman-Strub, G., Parmentier, F.J.W., Fratini, G., Gallagher, A., Maximov, T.C., and Dolman, A.J.: Evaluation of a plot-scale methane emission model using eddy covariance observations and footprint modelling. *Biogeosciences*, 11, 4651-4664, <https://doi.org/10.5194/bg-11-4651-2014>, 2014.
- Bouskill, N.J., Riley, W.J., Zhu, Q., Mekonnen, Z.A., and Grant, R.F.: Alaskan carbon-climate feedback will be weaker than inferred from short-term experiments, *Nat Commun*, 11, 5798, <https://doi.org/10.1038/s41467-020-19574-3>, 2020.
- 835 Chang, K-Y., Riley, W.J., Brodie, E.L., McCalley, C.K., Crill, P.M., and Grant, R.F.: Methane Production Pathway Regulated Proximally by Substrate Availability and Distally by Temperature in a High-Latitude Mire Complex, *Journal of Geophysical Research: Biogeosciences*, 124, 3057-3074, <https://doi.org/10.1029/2019JG005355>, 2019.
- Chen, S., Liu, L., Ma, Y., Zhuang, Q., and Shurpali, N.J.: Quantifying global wetland methane emissions within situ methane flux data and machine learning approaches, *Earth's Future*, 12, e2023EF004330, <https://doi.org/10.1029/2023EF004330>,  
840 2024.
- Chinta, S., Gao, X., and Zhu, Q.: Machine learning driven sensitivity analysis of E3SM land model parameters for wetland methane emissions, *Journal of Advances in Modeling Earth Systems*, 16, e2023MS004115, <https://doi.org/10.1029/2023MS004115>, 2024.
- Deng, J., Li, C., and Frohling, S.: Modelling impacts of changes in temperature and water table on C gas fluxes in an  
845 Alaskan peatland, *Journal of Geophysical Research: Biogeosciences*, 120(7), 1279-1295, <https://doi.org/10.1002/2014JG002880>, 2015.
- Denmead, O.T.: Approaches to measuring fluxes of methane and nitrous oxide between landscapes and the atmosphere, *Plant Soil*, 309, 5-24, <https://doi.org/10.1007/s11104-008-9599-z>, 2008.
- Erland, B. M., Thorpe, A.K., and Gamon, J. A.: Recent Advances Toward Transparent Methane Emissions Monitoring: A Review, *Environmental Science & Technology*, 56 (23), 16567-16581, <https://doi.org/10.1021/acs.est.2c02136>, 2022.  
850
- Fertitta-Roberts, C., Oikawa P.Y., Jenerette, G.D.: Evaluating the GHG mitigation-potential of alternate wetting and drying in rice through life cycle assessment, *Science of Total Environment*, 653, 1343-1353, <https://doi.org/10.1016/j.scitotenv.2018.10.327>, 2019.
- Fluet-Chouinard, E., Stocker, B.D., Zhang, Z. Malhotra, A., Melton, J.R., Poulter, B., Kaplan, J.O., Goldewijk, K.K., Siebert, S., Minayeva, T., Hugelius, G., Joosten, H., Barthelmes, A., Prigent, C., Aires, F., Hoyt, A.M., Davidson, N., Finlayson, C.M., Lehner, B., Jackson, R.B., McIntyre, P.B.: Extensive global wetland loss over the past three centuries, *Nature*, 614, 281-286, <https://doi.org/10.1038/s41586-022-05572-6>, 2023.  
855





- 860 Forbrich, I., Yazbeck, T., Sulman, B., Morin, T.H., Tang, A-C-I., Bohrer, G.: Three Decades of Wetland Methane Surface Flux Modeling by Earth System Models-Advances, Applications, and Challenges, *Journal of Geophysical Research: Biogeosciences*, 129, e2023JG007915, <https://doi.org/10.1029/2023JG007915>, 2024.
- Fumoto, T., Kobayashi, K., Li, C., Yagi, K., and Hasegawa, T.: Revising a process-based biogeochemistry model (DNDC) to simulate methane emission from rice paddy fields under various residue management and fertilizer regimes, *Glob. Chang. Biol.*, 14 (2), 382-402, <https://doi.org/10.1111/j.1365-2486.2007.01475.x>, 2008.
- 865 Gedney, N., and Cox, P.M.: The sensitivity of global climate model simulations to the representation of soil moisture heterogeneity, *J. Hydrometeorol.*, 4, 1265-1275, [https://doi.org/10.1175/1525-7541\(2003\)004%3C1265:TSGCM%3E2.0.CO;2](https://doi.org/10.1175/1525-7541(2003)004%3C1265:TSGCM%3E2.0.CO;2), 2003.
- Ge, M., Korrensalo, A., Laiho, R., Lohila, A., Makiranta, P., Pihlatie, M., Tuittila, E.-S., Kohl, L., Putkinen, A. and Koskinen, M.: Plant phenology and species-specific traits control plant CH<sub>4</sub> emissions in a northern boreal fen, *New Phytol.*, 238, 1019-1032, <https://doi.org/10.1111/nph.18798>, 2023.
- 870 Gilhespy, S., Anthony, S., Chadwick, D., del Prado, A., Li, C., Misselbrook, T., Rees, R.M., Salas, W., Sanz-Cobena, A., Smith, P., Tilston, E., Topp, C-F.E., Vetter, S., and Yeluripati, J. B.: First 20 years of DNDC (DeNitrification DeComposition): Model evolution, *Ecological Modelling*, 292(24), 51-62, <https://doi.org/10.1016/j.ecolmodel.2014.09.004>, 2014.
- 875 Granberg, G., Grip, H., Ottosson Löfvenius, M., I. Sundh, I., Svensson, B.H., and Nilsson, M.: A simple model for simulation of water content, soil frost, and soil temperatures in boreal mixed mires, *Water Resources Research*, 35(12), 3591-3968, <https://doi.org/10.1029/1999WR900216>, 1999.
- Grant, R.F.: Changes in Soil Organic Matter under Different Tillage and Rotation: Mathematical Modeling in ecosys, *Soil Sci. Soc. Am. J.*, 61, 1159-1175, <https://doi.org/10.2136/sssaj1997.03615995006100040023x>, 1997.
- 880 Grant, R.F.: Simulation of methanogenesis in the mathematical model Ecosys, *Soil Biol. Biochem.*, 30, 883-896, [https://doi.org/10.1016/S0038-0717\(97\)00218-6](https://doi.org/10.1016/S0038-0717(97)00218-6), 1998.
- Grant, R.F.: Simulation of methanotrophy in the mathematical model ecosys. *Soil Biology and Biochemistry*, 31(2), 287-297, [https://doi.org/10.1016/S0038-0717\(98\)00119-9](https://doi.org/10.1016/S0038-0717(98)00119-9), 1999.
- 885 Grant, R., and Roulet, N.: Methane efflux from boreal wetlands: Theory and testing of the ecosystem model Ecosys with chamber and tower flux measurements, *Global Biogeochem. Cycles*, 16 (4), 1054, <https://doi.org/10.1029/2001GB001702>, 2002.
- Grant, R.F., Baldocchi, D.D., and Ma, S.: Ecological controls on net ecosystem productivity of a seasonally dry annual grassland under current and future climates: Modelling with ecosys. *Agricultural and Forest Metrology*, 152,189-200, <https://doi.org/10.1016/j.agrformet.2011.09.012>, 2012.
- 890 Grant, R.F.: Modelling changes in nitrogen cycling to sustain increases in forest productivity under elevated atmospheric CO<sub>2</sub> and contrasting site conditions, *Biogeosciences*, 10, 7703-7721, <https://doi.org/10.5194/bg-10-7703-2013>, 2013.
- Grant, R.F.: Nitrogen mineralization drives the response of forest productivity to soil warming: Modelling in ecosys vs. measurements from the Harvard soil heating experiment, *Ecological Modelling*, 288, 38-46, <https://doi.org/10.1016/j.ecolmodel.2014.05.015>, 2014.



- 895 Grant, R.F., Humphreys, E.R., and Lafleur, P.M.: Ecosystem CO<sub>2</sub> and CH<sub>4</sub> exchange in a mixed tundra and a fen within a hydrologically diverse Arctic landscape: 1 Modeling versus measurements, *J. Geophys. Res. Biogeosci.*, 120, 1366-1387, <https://doi.org/10.1002/2014JG002888>, 2015a.
- Grant, R.F.: Ecosystem CO<sub>2</sub> and CH<sub>4</sub> exchange in a mixed tundra and a fen within a hydrologically diverse Arctic landscape: 2. Modelling impacts of climate change, *J. Geophys. Res. Biogeosci.*, 120, 1388-1406, <https://doi.org/10.1002/2014JG002889>, 2015b.
- 900 Grant, R.F., Mekonnen, Z.A., Riley, W.J., Wainwright, H.M., Graham, D., and Torn, M.S.: Mathematical modelling of arctic polygonal tundra with Ecosys: 1. Microtopography determines how active layer depths respond to changes in temperature and precipitation, *Journal of Geophysical Research: Biogeosciences*, 122, 3161-3173, <https://doi.org/10.1002/2017JG004035>, 2017a.
- 905 Grant, R.F., Mekonnen, Z.A., Riley, W. J., Arora, B., and Torn, M.S.: Mathematical modelling of arctic polygonal tundra with Ecosys: 2. Microtopography determines how CO<sub>2</sub> and CH<sub>4</sub> exchange responds to changes in temperature and precipitation, *Journal of Geophysical Research: Biogeosciences*, 122, 3174-3187, <https://doi.org/10.1002/2017JG004037>, 2017b.
- 910 Guimberteau, M., Zhu, D., Maignan, F., Huang, Y., Yue, C., Dantec-Nédélec, S., Ottlé, C., Jornet-Puig, A., Bastos, A., Laurent, P., Goll, D., Bowring, S., Chang, J., Guenet, B., Tifafi, M., Peng, S., Krinner, G., Ducharne, A., Wang, F., Wang, T., Wang, X., Wang, Y., Yin, Z., Lauerwald, R., Joetzjer, E., Qiu, C., Kim, H., and Ciais, P.: ORCHIDEE-MICT (v8.4.1), a land surface model for the high latitudes: model description and validation, *Geosci. Model Dev*, 11, 121-163, <https://doi.org/10.5194/gmd-11-121-2018>, 2018.
- 915 Günther, A., Barthelmes, A., Huth, V. Joosten, H., Jurasinski, G., Koebsch, F., Couwenberg, J.: Prompt rewetting of drained peatlands reduces climate warming despite methane emissions, *Nat Commun*, 11, 1644, <https://doi.org/10.1038/s41467-020-15499-z>, 2020.
- Hanson, P.J., Griffiths, N.A., Iversen, C.M., Norby, R.J., Sebestyen, S.D., Phillips, J.R., Chanton, J.P., Kolka, R.K., Malhotra, A., Oleheiser, K.C., Warren, J.M., Shi, X., Yang, X., Mao, J., and Ricciuto, D.M.: Rapid net carbon loss from a whole-ecosystem warmed Peatland, *AGU Advances*, 1, e2020AV000163, <https://doi.org/10.1029/2020AV000163>, 2020.
- 920 He, L., Lipson, D. A., Mazza Rodrigues, J. L., Mayes, M., Björk, R. G., Glaser, B., Thornton, P.E., and Xu, X.: Dynamics of fungal and bacterial biomass carbon in natural ecosystems: Site-level applications of the CLM-Microbe model, *Journal of Advances in Modeling Earth Systems*, 13, e2020MS002283, <https://doi.org/10.1029/2020MS002283>, 2021.
- He, L., Rodrigues, J.L.M., Mayes, M.A., Lai, C.-T., Lipson, D.A., and Xu, X.: Modeling microbial carbon fluxes and stocks in global soils from 1901 to 2016, *Biogeosciences*. 21, 2313-2333, <https://doi.org/10.5194/bg-21-2313-2024>, 2024.
- 925 Hermoso de Mendoza, I., Beltrami, H., MacDougall, A.H., and Mareschal, J.-C.: Lower boundary conditions in land surface models- effects on the permafrost and the carbon pools: a case study with CLM4.5, *Geosci. Model Dev*, 13, 1663-1683, <https://doi.org/10.5194/gmd-13-1663-2020>, 2020.
- Höglind, M., Van Oijen, M., Cameron, D., Persson, T.: Process-based simulation of growth and overwintering of grassland using the BASGRA model, *Ecol. Model*, 335, 1-15, <https://doi.org/10.1016/j.ecolmodel.2016.04.024>, 2016.
- 930 Höglind, M., Cameron, D., Persson, T., Huang, X., and van Oijen, M.: BASGRA\_N: a model for grassland productivity, quality, and greenhouse gas balance, *Ecol. Model*, 417, 108925, <https://doi.org/10.1016/j.ecolmodel.2019.108925>, 2020.



- Huang, X., Silvennoinen, H., Kløve, B., Regina, K., Kandel, T.P., Piayda, A., Karki, S., Lærke, P.E., and Höglind, M.: Modelling CO<sub>2</sub> and CH<sub>4</sub> emissions from drained peatlands with grass cultivation by the BASGRA-BGC model, *Science of the Total Environment*, 765, 144385, <https://doi.org/10.1016/j.scitotenv.2020.144385>, 2021.
- 935 Huang, Y., Ciais, P., Luo, Y., Zhu, D., Wang, Y., Qiu, C., Goll, D.S., Guenet, B., Makowski, D., De Graaf, I., Leifeld, J., Kwon, M.J., Hu, J., and Qu, L.: Tradeoff of CO<sub>2</sub> and CH<sub>4</sub> emissions from global peatlands under water-table drawdown, *Nat. Clim. Chang*, 11, 618-622, <https://doi.org/10.1038/s41558-021-01059-w>, 2021.
- Hugelius, G., Loisel, J., Chadburn, S., Jackson, R.B., Jones, M., MacDonald, G., Marushchak, M., Olefeldt, D., Packalen, M., Siewert, M.B., Treat, C., Turetsky, M., Voigt, C., and Yu, Z.: Large stocks of peatland carbon and nitrogen are vulnerable to permafrost thaw, *Proceedings of the National Academy of Sciences*, 117 (34), 20438-20446, 940 <https://doi.org/10.1073/pnas.1916387117>, 2020.
- Humpenöder, F., Karstens, K., Lotze-Campen, H., Leifeld, J., Menichetti, L., Barthelmes, A., and Popp, A.: Peatland protection and restoration are key for climate change mitigation, *Environmental Research Letters*, 15(10), 104093, <https://doi.org/10.1088/1748-9326/abae2a>, 2020.
- Hendriks, D.M.D., van Huissteden, J., Dolman, A.J., and van der Molen, M.K.: The full greenhouse gas balance of an 945 abandoned peat meadow. *Biogeosciences*, 4, 411-424. <https://doi.org/10.5194/bg-4-411-2007>, 2007.
- Hutchinson, G.L., and Livingston, G.P.: Soil-atmosphere gas exchange, in *Methods of Soil Analysis*, part 4, Physical Methods, edited by J. H. Dane, and G. C. Topp, pp. 1159-1182, Soil Sci. Soc. of Am., Madison, Wisconsin, 2002.
- Krinner, G., Viovy, N., de Noblet-Ducoudré, N., Ogée, J., Polcher, J., Friedlingstein, P., Ciais, P., Sitch, S., and Prentice, 950 I.C.: A dynamic global vegetation model for studies of the coupled atmosphere-biosphere system, *Global Biogeochem. Cycles*, 19, GB1015, <https://doi.org/10.1029/2003GB002199>, 2005.
- Kutzbach, L., Schneider, J., Sachs, T., Giebels, M., Nykänen, H., Shurpali, N. J., Martikainen, P. J., Alm, J., Wilmking, M.: CO<sub>2</sub> flux determination by closed-chamber methods can be seriously biased by inappropriate application of linear regression, *Biogeosciences*, 4(6), 1005-1025, <https://doi.org/10.5194/bg-4-1005-2007>, 2007.
- Lai, D.Y.F.: Modelling the effects of climate change on methane emission from a northern ombrotrophic bog in Canada. 955 *Environ Geology*, 58, 1197-1206, <https://doi.org/10.1007/s00254-008-1613-5>, 2009.
- Largerón, C., Krinner, G., Ciais, P., and Brutel-Vuilmet, C.: Implementing northern peatlands in a global land surface model: description and evaluation in the ORCHIDEE high-latitude version model (ORC-HL-PEAT), *Geosci. Model Dev*, 11, 3279-3297, <https://doi.org/10.5194/gmd-11-3279-2018>, 2018.
- Lawrence, D.M., Oleson, K.W., Flanner, M.G., Thornton, P.E., Swenson, S.C., Lawrence, P.J., Zeng, X., Yang, Z.L., Levis, 960 S., Sakaguchi, K., Bonan, G.B., Slater, A.G.: Parameterization Improvements and Functional and Structural Advances in Version 4 of the Community Land Model, *Journal of Advances in Modeling Earth Systems*, 3, M03001, <https://doi.org/10.1029/2011ms000045>, 2011.
- Leifeld, J., and Menichetti, L.: The underappreciated potential of peatlands in global climate change mitigation strategies, *Nat Commun*, 9, 1071, <https://doi.org/10.1038/s41467-018-03406-6>, 2018.
- 965 Leifeld, J., Wüst-Galley, C., and Page, S.: Intact and managed peatland soils as a source and sink of GHGs from 1850 to 2100, *Nat. Clim. Chang*, 9, 945-947, <https://doi.org/10.1038/s41558-019-0615-5>, 2019.
- Li, C., Frohling, and S., Frohling, T.A.: A model of nitrous oxide evolution from soil driven by rainfall events: 1. Model structure and sensitivity, *Journal of Geophysical Research: Atmosphere*, <https://doi.org/10.1029/92JD00509>, 1992.

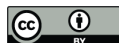

- 970 Li, C., Frohling, and S., Frohling, T.A.: A model of nitrous oxide evolution from soil driven by rainfall events: 2. Model applications, *Journal of Geophysical Research: Atmosphere*, <https://doi.org/10.1029/92JD00510>, 1992.
- Li, C.S.: Modeling trace gas emissions from agricultural ecosystems. In: Wassmann, R., Lantin, R.S., Neue, H.U. (eds) *Methane Emissions from Major Rice Ecosystems in Asia*, *Developments in Plant and Soil Sciences*, vol 91. Springer, Dordrecht, [https://doi.org/10.1007/978-94-010-0898-3\\_20](https://doi.org/10.1007/978-94-010-0898-3_20), 2000.
- 975 Li, T., Huang, Y., Zhang, W., and Song, C.: CH<sub>4</sub>MOD<sub>wetland</sub>: A biogeophysical model for simulating methane emissions from natural wetlands, *Ecological Modelling*, 221 (4), 666-680, <https://doi.org/10.1016/j.ecolmodel.2009.05.017>, 2010.
- Li, T., Huang, Y., Zhang, W., Yu, and Y.-Q.: Methane emissions associated with the conversion of marshland to cropland and climate change on the Sanjiang Plain of northeast China from 1950 to 2100, *Biogeosciences*, 9, 5199-5215, <https://doi.org/10.5194/bg-9-5199-2012>, 2012.
- 980 Li, T., Xie, B., Wang, G., Zhang, W., Zhang, Q., Vesala, T., and Raivonen, M.: Field-scale simulation of methane emissions from coastal wetlands in China using an improved version of CH<sub>4</sub>MOD<sub>wetland</sub>, *Science of Total Environment*, 559, 256-267, <https://doi.org/10.1016/j.scitotenv.2016.03.186>, 2016.
- Li, T., Zhang, Q., Cheng, Z., Wang, G., Yu, L., and Zhang, W.: Performance of CH<sub>4</sub>MOD<sub>wetland</sub> for the case study of different regions of natural Chinese wetland, *Journal of Environmental Sciences*, 57, 356-369, <https://doi.org/10.1016/j.jes.2017.01.001>, 2017.
- 985 Li, T., Li, H., Zhang, Q., Ma, Z., Yu, L., Lu, Y., Niu, Z., Sun, W., and Liu, J.: Prediction of CH<sub>4</sub> emissions from potential natural wetlands on the Tibetan Plateau during the 21st century, *Science of Total Environment*, 657, 498-508, <https://doi.org/10.1016/j.scitotenv.2018.11.275>, 2019.
- 990 Li, T., Lu, Y., Yu, L., Sun, W., Zhang, Q., Zhang, W., Wang, G., Qin, Z., Yu, L., Li, H., and Zhang, R.: Evaluation of CH<sub>4</sub>MOD<sub>wetland</sub> and Terrestrial Ecosystem Model (TEM) used to estimate global CH<sub>4</sub> emissions from natural wetlands, *Geosci. Model Dev*, 13, 3769-3788, <https://doi.org/10.5194/gmd-13-3769-2020>, 2020.
- Lippmann, T.J.R., van der Velde, Y., Heijmans, M.M.P.D., Dolman, H., Hendriks, D.M.D., and van Huissteden, K. (2023). Peatland-VU-NUCOM (PVN 1.0): using dynamic plant functional types to model peatland vegetation, CH<sub>4</sub>, and CO<sub>2</sub> emissions, *Geosci. Model Dev*, 16, 6773-6804, <https://doi.org/10.5194/gmd-16-6773-2023>, 2023.
- 995 Liu, Y., Paris, J.-D., Vrekoussis, M., Qu  h  , P.-Y., Desservettaz, M., Kushta, J., Dubart, F., Demetriou, D., Bousquet, P., and Sciare, J.: Reconciling a national methane emission inventory with in-situ measurements, *Science of the Total Environment*, 901, 165896, <https://doi.org/10.1016/j.scitotenv.2023.165896>, 2023.
- Loisel, J., and Gallego-Sala, A.: Ecological resilience of restored peatlands to climate change, *Commun Earth Environ*, 3, 208, <https://doi.org/10.1038/s43247-022-00547-x>, 2022.
- 1000 Lu, X., and Zhuang, Q.: Evaluating climate impacts on carbon balance of the terrestrial ecosystems in the Midwest of the United States with a process-based ecosystem model, *Mitig Adapt Strateg Glob Change*, 15, 467-487, <https://doi.org/10.1007/s11027-010-9228-z>, 2010.
- Ma, S., Worden, J.R., Bloom, A.-A., Zhang, Y., Poulter, B., Cusworth, D.H., Yin, Y., Pandey, S., Maasackers, J.D., Lu, X., Shen, L., Sheng, J., Frankenberg, C., Miller, C.E., and Jacob, D.J.: Satellite Constraints on the Latitudinal Distribution and Temperature Sensitivity of Wetland Methane Emissions. *AGU Advances*, 2, e2021AV000408, <https://doi.org/10.1029/2021AV000408>, 2021.
- 1005

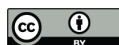

- Ma, S., Jiang, L., Wilson, R. M., Chanton, J. P., Bridgham, S., Niu, S., Iversen, C. M., Malhotra, A., Jiang, J., Lu, X., Huang, Y., Keller, J., Xu, X., Ricciuto, D. M., Hanson, P. J., and Luo, Y. Evaluating alternative ebullition models for predicting peatland methane emission and its pathways via data-model fusion, *Biogeosciences*, 19, 2245-2262, <https://doi.org/10.5194/bg-19-2245-2022>, 2022.
- 1010 Mack, S.K., Lane, R.R., Deng, J., Morris, J.T., and Bauer, J.J.: Wetland carbon models: Applications for wetland carbon commercialization, *Ecological Modelling*, 476, 110228, <https://doi.org/10.1016/j.ecolmodel.2022.110228>, 2023.
- Maier, M., Weber, T.K.D., Fiedler, J., Fuß, R., Glatzel, S., Huth, V., Jordan, S., Jurasinski, G., Kutzbach, L., Schäfer, K., Weymann, D., and Hagemann, U.: Introduction of a guideline for measurements of greenhouse gas fluxes from soils using non-steady-state chambers, *Journal of Plant Nutrition and Soil Science*, 185, 447-461, <https://doi.org/10.1002/jpln.202200199>, 2022.
- 1015 McNicol, G., Fluet-Chouinard, E., Ouyang, Z., Knox, S., Zhang, Z., Aalto, T., Bansal, S., Chang, K-Y., Chen, M., Delwiche, K., Feron, S., Goeckede, M., Liu, J., Malhotra, A., Melton, J.R., Riley, W., Vargas, R., Yuan, K., Ying, Q., Zhu, Q., Alekseychik, P., Aurela, M., Billesbach, D.P., Campbell, D.I., Chen, J., Chu, H., Desai, A.R., Euskirchen, E., Goodrich, J., Griffis, T., Helbig, M., Hirano, T., Iwata, H., Jurasinski, G., King, J., Koebsch, F., Kolka, R., Krauss, K., Lohila, A., Mammarella, I., Nilson, M., Noormets, A., Oechel, W., Peichl, M., Sachs, M.T., Sakabe, A., Schulze, C., Sonntag, O., Sullivan, R.C., Tuittila, E-C., Ueyama, M., Vesala, T., Ward, E., Wille, C., Wong, G. X., Zona, D., Windham-Myers, L., Poulter, B., and Jackson, R.B.: Upscaling wetland methane emissions from the FLUXNET-CH<sub>4</sub> eddy covariance network (UpCH<sub>4</sub> v1.0): Model development, network assessment, and budget comparison, *AGU Advances*, 4, e2023AV000956, <https://doi.org/10.1029/2023AV000956>, 2023.
- 1025 Meissner, K.J., Weaver, A.J., Matthews, H.D. and Cox, P.M.: The role of land surface dynamics in glacial inception: A study with the UVic Earth System Model, *Clim. Dyn.*, 21, 515-537, <https://doi.org/10.1007/s00382-003-0352-2>, 2003.
- Mi, Y., van Huissteden, J., Parmentier, F.J.W., Gallagher, A., Budishchev, A., Berridge, C.T., and Dolman, A.J.: Improving a plot-scale methane emission model and its performance at a northeastern Siberian tundra site, *Biogeosciences*, 11, 3985-3999, <https://doi.org/10.5194/bg-11-3985-2014>, 2014.
- 1030 Mozafari, B., Bruen, M., Donohue, S., Renou-Wilson, F., and O'Loughlin, F.: Peatland dynamics: A review of process-based models and approaches, *Science of The Total Environment*, 877, 162890, <https://doi.org/10.1016/j.scitotenv.2023.162890>, 2023.
- Morin, T.H., Riley, W.J., Grant, R.F., Mekonnen, Z., Stefanik, K.C., Sanchez, A-C-R., Mulhare, M.A., Villa, J., Wrighton, K., and Bohrer, G.: Water level changes in Lake Erie drive 21st century CO<sub>2</sub> and CH<sub>4</sub> fluxes from a coastal temperate wetland, *Science of The Total Environment*, 821, 153087, <https://doi.org/10.1016/j.scitotenv.2022.153087>, 2022.
- 1035 Morin, T.H., Bohrer, G., Stefanik, K.C., Rey-Sanchez, A.C., Matheny, A.M., and Mitsch, W.J.: Combining eddy-covariance and chamber measurements to determine the methane budget from a small, heterogeneous urban floodplain wetland park, *Agricultural and Forest Metrology*, 237-238 (1), 160-170, <https://doi.org/10.1016/j.agrformet.2017.01.022>, 2017.
- 1040 Nash, J.E., and Sutcliffe, J.V.: River flow forecasting through conceptual models' part I-A discussion of principles, *Journal of Hydrology*, 10(3), 282-290, [https://doi.org/10.1016/0022-1694\(70\)90255-6](https://doi.org/10.1016/0022-1694(70)90255-6), 1970.
- Nichols, J.E., and Peteet, D.M.: Rapid expansion of northern peatlands and doubled estimate of carbon storage, *Nat. Geosci.* 12, 917-921. <https://doi.org/10.1038/s41561-019-0454-z>, 2019.





- 1045 Nzotungicimpaye, C.-M., Zickfeld, K., MacDougall, A.H., Melton, J.R., Treat, C.C., Eby, M., and Lesack, L.F.W. WETMETH 1.0: a new wetland methane model for implementation in Earth system models, *Geosci. Model Dev*, 14, 6215-6240, <https://doi.org/10.5194/gmd-14-6215-2021>, 2021.
- Oertel, C., Herklotz, K., Matschullat, J., and Zimmerman, F.: Nitric oxide emissions from soils: a case study with temperate soils from Saxony, Germany, *Enviro Earth Sci*, 66, 2343-2351, <https://doi.org/10.1007/s12665-011-1456-3>, 2012.
- 1050 Oikawa, P.Y., Jenerette, G.D., Knox, S.H., Sturtevant, C., Verfaillie, J., Dronova, I., Poindexter, C.M., Eichelmann, E., and Baldocchi, D.D.: Evaluation of a hierarchy of models reveals the importance of substrate limitation for predicting carbon dioxide and methane exchange in restored wetlands, *J. Geophys. Res. Biogeosci*, 122, 145-167, <https://doi.org/10.1002/2016JG003438>, 2017.
- Oleson, K.W., Bonan, G.B., Feddema, J.J., Vertenstein, M., and Kluzek, E.: Technical description of urban parameterization for the Community Land Model (CLMU), NCAR Technical Note NCAR/TN-480+STR, 169 pp, 2010.
- 1055 Papale, D., Reichstein, M., Aubinet, M., Canfora, E., Bernhofer, C., Kutsch, W., Longdoz, B., Rambal, S., Valentini, R., Vesala, T., and Yakir, D.: Towards a standardized processing of Net Ecosystem Exchange measured with eddy covariance technique: algorithms and uncertainty estimation, *Biogeosciences*, 3, 571-583, <https://doi.org/10.5194/bg-3-571-2006>, 2006.
- Peltola, O., Raivonen, M., Li, X., and Vesala, T.: Technical note: Comparison of methane ebullition modelling approaches used in terrestrial wetland models, *Biogeosciences*, 15, 937-951, <https://doi.org/10.5194/bg-15-937-2018>, 2018.
- 1060 Petrescu, A.M.R., van Huissteden, J., Jackowicz-Korczynski, M., Yurova, A., Christensen, T.R., Crill, P.M., Bäckstrand, K., and Maximov, T.C.: Modelling CH<sub>4</sub> emissions from arctic wetlands: effects of hydrological parameterization. *Biogeosciences*, 5, 111-121, <https://doi.org/10.5194/bg-5-111-2008>, 2008.
- Petrescu, A.M.R., van Beek, L.P.H., van Huissteden, J., Prigent, C., Sachs, T., Corradi, C.A.R., Parmentier, F.J.W., and Dolman, A.J.: Modelling regional to global CH<sub>4</sub> emissions of boreal and arctic wetlands, *Global Biogeochem. Cycles*, 24, GB4009, <https://doi.org/10.1029/2009GB003610>, 2010.
- 1070 Qiu, C., Zhu, D., Ciais, P., Guenet, B., Krinner, G., Peng, S., Aurela, M., Bernhofer, C., Brümmner, C., Bret-Harte, S., Chu, H., Chen, J., Desai, A. R., Dušek, J., Euskirchen, E. S., Fortuniak, K., Flanagan, L. B., Friborg, T., Grygoruk, M., Gogo, S., Grünwald, T., Hansen, B. U., Holl, D., Humphreys, E., Hurkuck, M., Kiely, G., Klatt, J., Kutzbach, L., Langeron, C., Laggoun-Défarge, F., Lund, M., Lafleur, P. M., Li, X., Mammarella, I., Merbold, L., Nilsson, M. B., Olejnik, J., Ottosson-Löfvenius, M., Oechel, W., Parmentier, F.-J. W., Peichl, M., Pirk, N., Peltola, O., Pawlak, W., Rasse, D., Rinne, J., Shaver, G., Schmid, H. P., Sottocornola, M., Steinbrecher, R., Sachs, T., Urbaniak, M., Zona, D., and Ziemblinska, K.: ORCHIDEE-PEAT (revision 4596), a model for northern peatland CO<sub>2</sub>, water, and energy fluxes on daily to annual scales, *Geosci. Model Dev*, 11, 497-519, <https://doi.org/10.5194/gmd-11-497-2018>, 2018.
- 1075 Qiu, C., Zhu, D., Ciais, P., Guenet, B., Peng, S., Krinner, G., Tootchi, A., Ducharme, A., and Hastie, A.: Modelling northern peatland area and carbon dynamics since the Holocene with the ORCHIDEE-PEAT land surface model (SVN r5488), *Geosci. Model Dev*, 12, 2961-2982, <https://doi.org/10.5194/gmd-12-2961-2019>, 2019.
- Qiu C, Zhu D, Ciais P, Guenet B, and Peng S.: The role of northern peatlands in the global carbon cycle for the 21st century, *Global Ecol Biogeogr*, 29, 956-973, <https://doi.org/10.1111/geb.13081>, 2020.
- 1080 Qiu, C., Ciais, P., Zhu, D., Guenet, B., Peng, S., Petrescu, A-M-R., Lauerwald, R., Makowski, D., Gallego-Sala, A.V., Charman, D.J., and Brewer, S.C.: Large historical carbon emissions from cultivated northern peatlands. *Sciences Advances*, 7 (23), 1-10, <https://www.science.org/doi/epdf/10.1126/sciadv.abf1332>, 2021.





- 1085 Raivonen, M., Smolander, S., Backman, L., Susiluoto, J., Aalto, T., Markkanen, T., Mäkelä, J., Rinne, J., Peltola, O., Aurela, M., Lohila, A., Tomasic, M., Li, X., Larmola, T., Juutinen, S., Tuittila, E.-S., Heimann, M., Sevanto, S., Kleinen, T., Brovkin, V., and Vesala, T.: HIMMELI v1.0: Helsinki Model of Methane build-up and emission for peatlands, *Geosci. Model Dev*, 10, 4665-4691, <https://doi.org/10.5194/gmd-10-4665-2017>, 2017.
- Ricciuto, D. M., Xu, X., Shi, X., Wang, Y., Song, X., Schadt, C. W., Griffiths, N.A., Mao, J., Warren, J.M., Thornton, P.E., Chanton, J., Keller, J.K., Bridgham, S.C., Gutknecht, J., Sebestyen, S.D., Finzi, A., Kolka, R., and Hanson, P.J.: An integrative model for soil biogeochemistry and methane processes: I. Model structure and sensitivity analysis, *Journal of Geophysical Research: Biogeosciences*, 126, e2019JG005468, <https://doi.org/10.1029/2019JG005468>, 2021.
- 1090 Riley, W.J., Subin, Z.M., Lawrence, D.M., Swenson, S.C., Torn, M.S., Meng, L., Mahowald, N.M., and Hess, P.: Barriers to predicting changes in global terrestrial methane fluxes: analyses using CLM4Me, a methane biogeochemistry model integrated in CESM, *Biogeosciences*, 8, 1925-1953, <https://doi.org/10.5194/bg-8-1925-2011>, 2011.
- Sabbatini, S., Mammarella, I., Arriga, N., Fratini, G., Graf, A., Hörtnagl, L., Ibrom, A., Longdoz, B., Mauder, M., Merbold, L., Metzger, S., Montagnani, L., Pitacco, A., Rebmann, C., Sedláč, P., Šigut, L., Vitale, D., and Papale, D.: Eddy covariance raw data processing for CO<sub>2</sub> and energy fluxes calculation at ICOS ecosystem stations, *Int. Agrophys*, 32(4), 495-515, <https://doi.org/10.1515/intag-2017-0043>, 2018.
- 1095 Salmon, E., Jégou, F., Guenet, B., Jourdain, L., Qiu, C., Bastrov, V., Guimbaud, C., Zhu, D., Ciais, P., Peylin, P., Gogo, S., Laggoun-Défarge, F., Aurela, M., Bret-Harte, M. S., Chen, J., Chojnicki, B. H., Chu, H., Edgar, C. W., Euskirchen, E. S., Flanagan, L. B., Fortuniak, K., Holl, D., Klatt, J., Kolle, O., Kowalska, N., Kutzbach, L., Lohila, A., Merbold, L., Pawlak, W., Sachs, T., and Ziemblínska, K.: Assessing methane emissions for northern peatlands in ORCHIDEE-PEAT revision 7020, *Geosci. Model Dev*, 15, 2813-2838, <https://doi.org/10.5194/gmd-15-2813-2022>, 2022.
- 1100 Shahan, J., Chu, H., Windham-Myers, L., Matsumura, M., Carlin, J., Eichelmann, E., Stuart-Haentjens, E., Bergamaschi, B., Nakatsuka, K., Sturtevant, C., and Oikawa, P.: Combining eddy covariance and chamber methods to better constrain CO<sub>2</sub> and CH<sub>4</sub> fluxes across a heterogeneous restored tidal wetland, *Journal of Geophysical Research: Biogeosciences*, 127, e2022JG007112, <https://doi.org/10.1029/2022JG007112>, 2022.
- Shi, X., Thornton, P.E., Ricciuto, D.M., Hanson, P.J., Mao, J., Sebestyen, S.D., Griffiths, N.A., and Bisht, G.: Representing northern peatland microtopography and hydrology within the Community Land Model, *Biogeosciences*, 12, 6463-6477, <https://doi.org/10.5194/bg-12-6463-2015>, 2015.
- 1110 Schrier-Uijla, A.P., Kroon, P.S., Hensen, A., Leffelaar, P.A., Berendse, F., Veenendaal, E.M.: Comparison of chamber and eddy covariance-based CO<sub>2</sub> and CH<sub>4</sub> emission estimates in a heterogeneous grass ecosystem on peat, *Agricultural and forest metrology*, 150(6), 825-831, <https://doi.org/10.1016/j.agrformet.2009.11.007>, 2010.
- Stocker, B.D., Spahni, R., and Joos, F.: DYPTOP: a cost-efficient TOPMODEL implementation to simulate sub-grid spatio-temporal dynamics of global wetlands and peatlands, *Geosci. Model Dev*, 7, 3089-3110, <https://doi.org/10.5194/gmd-7-3089-2014>, 2014.
- 1115 Susiluoto, J., Raivonen, M., Backman, L., Laine, M., Makela, J., Peltola, O., Vesala, T., and Aalto, T.: Calibrating the sqHIMMELI v1.0 wetland methane emission model with hierarchical modeling and adaptive MCMC, *Geosci. Model Dev*, 11, 1199-1228, <https://doi.org/10.5194/gmd-11-1199-2018>, 2018.
- Taft, H.E., Cross, P.A., Hastings, A., Yeluripati, J., and Jones, D.L.: Estimating greenhouse gases emissions from horticultural peat soils using a DNDC modelling approach, *Journal of Environmental Management*, 233, 681-694, <https://doi.org/10.1016/j.jenvman.2018.11.113>, 2019.
- 1120



- Tan, L., Ge, Z., Zhou, X., Li, S., Li, X., Tang, J.: Conversion of coastal wetlands, riparian wetlands, and peatlands increases greenhouse gas emissions: A global meta-analysis, *Global Change Biol*, 26, 1638-1653, <https://doi.org/10.1111/gcb.14933>, 2020.
- 1125 Tang, J., Zhuang, Q., Shannon, R.D., and White, J.R.: Quantifying wetland methane emissions with process-based models of different complexities, *Biogeosciences*, 7, 3817-3837, <https://doi.org/10.5194/bg-7-3817-2010>, 2010.
- Ueyama, M., Knox, S.H., Delwiche, K.B., Bansal, S., Riley, W.J., Baldocchi, D., Hirano, T., McNicol, G., Schafer, K., Windham-Myers, L., Poulter, B., Jackson, R.B., Chang, K.-Y., Chen, J., Chu, H., Desai, A.R., Gogo, S., Iwata, H., Kang, M., Mammarella, I., Peichl, M., Sonnentag, O., Tuittila, E-S., Ryu, Y., Euskirchen, E.S., Göckede, M., Jacotot, A., Nilsson, M.B., and Sachs, T.: Modeled production, oxidation, and transport processes of wetland methane emissions in temperate, boreal, and Arctic regions. *Global Change Biology*, 29, 2313-2334, <https://doi.org/10.1111/gcb.16594>, 2023.
- 1130 U.S. DOE.: Artificial Intelligence for the Methane Cycle, DOE/SC-0213, U.S. Department of Energy Office of Science, <https://doi.org/10.2172/2204972>, 2024.
- van Huissteden, J., van den Bos, R., and Alvarez, I.M.: Modelling the effect of water-table management on CO<sub>2</sub> and CH<sub>4</sub> fluxes from peat soils, *Neth. J. Geosci*, 85(1), 3-18, <https://doi.org/10.1017/S0016774600021399>, 2006.
- 1135 van Huissteden, J., Petrescu, A.M.R., Hendriks, D.M.D., and Rebel, K.T.: Sensitivity analysis of a wetland methane emission model based on temperate and arctic wetland sites, *Biogeosciences*, 6, 3035-3051, <https://doi.org/10.5194/bg-6-3035-2009>, 2009.
- Vroom, R.J.E., Geurts, J.J.M., Nouta, R., Borst, A.C.W., Lamers, L.P.M., and Fritz, C.: Paludiculture crops and nitrogen kick-start ecosystem service provisioning in rewetted peat soils, *Plant Soil*, 474, 337-354, <https://doi.org/10.1007/s11104-022-05339-y>, 2022.
- 1140 Walter, B.P., and M. Heimann: A process-based, climate-sensitive model to derive methane emissions from natural wetlands: Application to five wetland sites, sensitivity to model parameters, and climate, *Glob. Biogeochem. Cycles*, 14 (3), 745-765, <https://doi.org/10.1029/1999GB001204>, 2000.
- Weaver, A.J., Eby, M., Wiebe, E.C., Bitz, C.M., Duffy, P.B., Ewen, T.L., Fanning, A.F., Holland, M.M., MacFayden, A., 1145 Matthews, H.D., Meissner, K.J., Saenko, O., Schmittner, A., Wang, H., and Yoshimori, M.: The UVic Earth System Climate Model: Model description, climatology, and applications to past, present and future climates, *Atmosphere-Ocean*, 39, 361-428, <https://doi.org/10.1080/07055900.2001.9649686>, 2001.
- Wang, Y., Yuan, F., Yuan, F., Gu, B., Hahn, M.S., Torn, M.S., Ricciuto, D.M., Kumar, J., He, L., Zona, D., Lipson, D.A., Wagner, R., Oechel, W.C., Wullschlegel, S.D., Thornton, P.E., and Xu, F.: Mechanistic Modeling of Microtopographic 1150 Impacts on CO<sub>2</sub> and CH<sub>4</sub> Fluxes in an Alaskan Tundra Ecosystem using CLM-Microbe Model, *Journal of Advances in Modeling Earth Systems*, 11, 4288-4304, <https://doi.org/10.1029/2019MS001771>, 2019.
- Wang, J.M., Murphy, J.G., Geddes, J.A., Winsborough, C.L., Basiliko, N., and Thomas, S.C.: Methane fluxes measured by eddy covariance and static chamber techniques at a temperate forest in central Ontario, Canada, *Biogeosciences*, 10, 4371-4382, <https://doi.org/10.5194/bg-10-4371-2013>, 2013.
- 1155 Wania, R., Ross, I., and Prentice, I.C.: Integrating peatlands and permafrost into a dynamic global vegetation model: 1, Evaluation and sensitivity of physical land surface processes, *Global Biogeochemical Cycles*, 23, GB3014, <https://doi.org/10.1029/2008GB003412>, 2009a.



- 1160 Wania, R., Ross, I., and Prentice, I.C.: Integrating peatlands and permafrost into a dynamic global vegetation model: 2, Evaluation and sensitivity of vegetation and carbon cycle processes, *Global Biogeochemical Cycles*, 23, GB3015, <https://doi.org/10.1029/2008GB003413>, 2009b.
- Wania, R., Ross, I., and Prentice, I.C.: Implementation and evaluation of a new methane model within a dynamic global vegetation model: LPJ-WHyMe v1.3.1, *Geosci. Model Dev*, 3, 565-584, <https://doi.org/10.5194/gmd-3-565-2010>, 2010.
- 1165 Webster, K.L., McLaughlin, J.W., Kim, Y., Packalen, M.S., and Li, C.: Modelling carbon dynamics and response to environmental change along a boreal fen nutrient gradient, *Ecological Modelling*, 248(10), 148-164, <https://doi.org/10.1016/j.ecolmodel.2012.10.004>, 2013.
- Wilson, D., Dixon, S.D., Artz, R.R.E., Smith, T.E.L., Evans, C.D., Owen, H.J.F., Archer, E., and Renou-Wilson, F.: Derivation of greenhouse gas emission factors for peatlands managed for extraction in the Republic of Ireland and the United Kingdom, *Biogeosciences*, 12, 5291-5308, <https://doi.org/10.5194/bg-12-5291-2015>, 2015.
- 1170 Xiaofeng, X., Schimel, J.P., Thornton, P.E., Xia, S., Fengming, Y., and Goswami, S.: Substrate and Environmental Controls on Microbial Assimilation of Soil Organic Carbon: A Framework for Earth System Models, *Ecology Letters*, 17 (5), 547-555, <https://doi.org/10.1111/ele.12254>, 2014.
- Xiaofeng, X., Elias, D.A., Graham, D.E., Phelps, T.J., Carroll, S.L., Wullschleger, S.D., and Thornton, P.E.: A Microbial Functional group-based Module for Simulating Methane Production and Consumption: Application to an Incubated Permafrost Soil, *Journal of Geophysical Research Biogeosciences*, 120 (7), 1315-1333, <https://doi.org/10.1002/2015JG002935>, 2015.
- 1175 Xiao, H., Song, C., Li, S., Lu, X., Liang, M., Xia, X., and Yuan, W.: Global wetland methane emissions from 2001 to 2020: Magnitude, dynamics and controls, *Earth's Future*, 12, e2024EF004794, <https://doi.org/10.1029/2024EF004794>, 2024.
- Xu, X., Elias, D.A., Graham, D.E., Phelps, T.J., Carroll, S.L., Wullschleger, S.D., and Thornton, P.E.: A microbial functional group-based module for simulating methane production and consumption: Application to an incubated permafrost soil, *Journal of Geophysical Research: Biogeosciences*, 120, 1315-1333, <https://doi.org/10.1002/2015JG002935>, 2015.
- 1180 Xu, X., Yuan, F., Hanson, P. J., Wullschleger, S.D., Thornton, P.E., Riley, W.J., Song, X., Graham, D.E., Song, C., and Tian, H.: Reviews and syntheses: Four decades of modeling methane cycling in terrestrial ecosystems, *Biogeosciences*, 13, 3735-3755, <https://doi.org/10.5194/bg-13-3735-2016>, 2016.
- 1185 Yang, W.H., McNicol, G., Teh, Y.A., Estera-Molina, K., Wood, T.E., and Silver, W.L.: Evaluating the classical versus an emerging conceptual model of peatland methane dynamics, *Global Biogeochemical Cycles*, 31, 1435-1453, <https://doi.org/10.1002/2017GB005622>, 2017.
- Yuan, F., Wang, Y., Ricciuto, D.M., Shi, X., Yuan, F., Brehme, T., Bridgham, S., Keller, J., Warren, J.M., Griffiths, N.A., Sebestyen, S.D., Hanson, P.J., Thornton, P.E., and Xu, X.: Hydrological feedback on peatland CH<sub>4</sub> emission under warming and elevated CO<sub>2</sub>: A modeling study, *Journal of Hydrology*, 603 part D, 127137, <https://doi.org/10.1016/j.jhydrol.2021.127137>, 2021.
- 1190 Zhao, J., Weldon, S., Barthelmes, A. Swails, E., Hergoualc'h, K., Mander, U., Qiu, C., Connolly, J., Silver, W.L., and Campbell, D.I.: Global observation gaps of peatland greenhouse gas balances needs and obstacles, *Biogeochemistry*, 167, 427-442, <https://doi.org/10.1007/s10533-023-01091-2>, 2024.
- Zhang, Y., C. Li, C. C. Trettin, H. Li, and G. Sun.: An integrated model of soil, hydrology, and vegetation for carbon dynamics in wetland ecosystems, *Global Biogeochem. Cycles*, 16 (4), 1061, <https://doi.org/10.1029/2001GB001838>, 2002.



- Zhang, Q., Li, T-T., Zhang, Q., Wang, G-C., Yu, L-J., Guo, B., and Han, P-F.: Accuracy analysis in CH<sub>4</sub>MOD<sub>wetland</sub> in the simulation of CH<sub>4</sub> emissions from Chinese wetlands, *Advances in Climate Change Research*, 11 (1), 52-59, <https://doi.org/10.1016/j.accr.2020.06.003>, 2020.
- 1200 Zhang, Z., Chatterjee, A., Ott, L., Reichle, R., Feldman, A.F., and Poulter, B.: Effect of Assimilating SMAP Soil Moisture on CO<sub>2</sub> and CH<sub>4</sub> Fluxes through Direct Insertion in a Land Surface Model, *Remote Sensing*, 14 (10), 2405, <https://doi.org/10.3390/rs14102405>, 2022.
- Zhu, Q., Liu, J., Peng, C., Chen, H., Fang, X., Jiang, H., Yang, G., Zhu, D., Wang, W., and Zhou, X.: Modelling methane emissions from natural wetlands by development and application of the TRIPLEX-GHG model, *Geosci. Model Dev*, 7, 981-999, <https://doi.org/10.5194/gmd-7-981-2014>, 2014.
- 1205 Zhu, Q., Peng, C., Liu, J., Jiang, H., Fang, X., Chen, H., Niu, Z., Gong, P., Lin, G., Wang, M., Wang, H., Yang, Y., Chang, J., Ge, Y., Xiang, W., Deng, X., and He, J-S.: Climate-driven increase of natural wetland methane emissions offset by human-induced wetland reduction in China over the past three decades, *Sci Rep* 6, 38020, <https://doi.org/10.1038/srep38020>, 2016.
- Zhu, Q., Peng, C., Ciais, P., Jiang, H., Liu, J., Bousquet, P., Li, S., Chang, J., Fang, X., Zhou, X., Chen, H., Liu, S., Lin, G., Gong, P., Wang, M., Wang, H., Xiang, W., and Chen, J.: Interannual variation in methane emissions from tropical wetlands triggered by repeated El Niño Southern Oscillation, *Global Change Biology*, 23, 4706-4716, <https://doi.org/10.1111/gcb.13726>, 2017.
- 1210 Zhuang, Q., Melillo, J.M., Kicklighter, D.W., Prinn, R.G., McGuire, A.D., Steudler, P.A., Felzer, B.S., and Hu, S.: Methane fluxes between terrestrial ecosystems and the atmosphere at northern high latitudes during the past century: A retrospective analysis with a process-based biogeochemistry model, *Global Biogeochemical Cycles*, 18, GB3010, <https://doi.org/10.1029/2004GB002239>, 2004.
- 1215 Zhuang, Q., He, J., Lu, Y., Ji, L., Xiao, J., and Luo, T.: Carbon dynamics of terrestrial ecosystems on the Tibetan Plateau during the 20th century: an analysis with a process-based biogeochemical model, *Global Ecology and Biogeography*, 19, 649-662, <https://doi.org/10.1111/j.1466-8238.2010.00559.x>, 2010.
- 1220 Zuo, Y., Wang, Y., He, L., Wang, N., Liu, J., Yuan, F., Li, K., Guo, Z., Sun, Y., Zhu, X., Zhang, L., Song, C., Sun, Li., and Xu, X.: Modelling methane dynamics in three wetlands in Northeastern China by using the CLM-Microbe model, *Ecosystem Health and Sustainability*, 8(1), 2074895, <https://doi.org/10.1080/20964129.2022.2074895>, 2022.
- Zuo, Y., He, L., Wang, Y., Liu, J., Wang, N., Li, K., Guo, Z., Zhang, L., Chen, N., Song, C., Yuan, F., Sun, Li., and Xu, X.: Genome-enabled parameterization enhances model simulation of CH<sub>4</sub> cycling in four natural wetlands, *Journal of Advances in Modeling Earth Systems*, 16, e2023MS004139, <https://doi.org/10.1029/2023MS004139>, 2024.

1225

1230
